1 **Compartmentation of photosynthesis gene expression between mesophyll and bundle sheath**  
2 **cells of C<sub>4</sub> maize is dependent on time of day**

3  
4 Borba AR<sup>1,2,3,a</sup>, Reyna-Llorens I<sup>1,a</sup>, Dickinson PJ<sup>1</sup>, Steed G<sup>1</sup>, Gouveia P<sup>2,3</sup>, Górska AM<sup>2,3</sup>, Gomes C<sup>2,3</sup>,  
5 Kromdijk J<sup>1</sup>, Webb AAR<sup>1</sup>, Saibo NJM<sup>2,3,b</sup>, Hibberd JM<sup>1,b</sup>

6  
7  
8  
9 <sup>a</sup> These authors contributed equally to this work.

10 <sup>b</sup> Co-corresponding authors. [saibo@itqb.unl.pt](mailto:saibo@itqb.unl.pt); [jmh65@cam.ac.uk](mailto:jmh65@cam.ac.uk).

11  
12 <sup>1</sup> Department of Plant Sciences, Downing Street, University of Cambridge, Cambridge CB2 3EA, UK.

13 <sup>2</sup> Instituto de Tecnologia Química e Biológica António Xavier, Universidade Nova de Lisboa, 2780-  
14 157, Oeiras, Portugal.

15 <sup>3</sup> Instituto de Biologia Experimental e Tecnológica, 2780-157, Oeiras, Portugal.

16  
17 A.G. present address: Molecular Plant Physiology Department, University of Graz, Austria  
18 ([alicja.gorska@uni-graz.at](mailto:alicja.gorska@uni-graz.at)).

19 I.R-L. present address: present address: Centre for Research in Agricultural Genomics (CRAG) CSIC-  
20 IRTA-UAB-UB, Campus UAB, Bellaterra, Barcelona, Spain ([ivan.reyna-llorens@cragenomica.es](mailto:ivan.reyna-llorens@cragenomica.es))

21  
22  
23 **Keywords:** C<sub>4</sub> photosynthesis, mesophyll, bundle sheath, gene expression, maize

24 **Abstract**

25 Compared with the ancestral C<sub>3</sub> state, C<sub>4</sub> photosynthesis enables higher rates of photosynthesis as  
26 well as improved water and nitrogen use efficiencies. In both C<sub>3</sub> and C<sub>4</sub> plants rates of  
27 photosynthesis increase with light intensity and so are maximal around midday. We report that in  
28 the absence of light or temperature fluctuations, photosynthesis in maize peaks in the middle of  
29 the subjective photoperiod. To investigate molecular processes associated with these changes, we  
30 undertook RNA-sequencing of maize mesophyll and bundle sheath strands over a 24-hour time-  
31 course. Cell-preferential expression of C<sub>4</sub> cycle genes was strongest between six and ten hours  
32 after dawn when rates of photosynthesis were highest. For the bundle sheath, DNA motif  
33 enrichment and gene co-expression analyses suggested members of the DOF and MADS-domain  
34 transcription factor families mediate diurnal fluctuations in C<sub>4</sub> gene expression, and *trans*-  
35 activation assays *in planta* confirmed their ability to activate promoter fragments from bundle  
36 sheath expressed genes. The work thus identifies transcriptional regulators as well as peaks in cell-  
37 specific C<sub>4</sub> gene expression coincident with maximum rates of photosynthesis in the maize leaf at  
38 midday.

## 39 Introduction

40 In hot and dry environments, C<sub>4</sub> species can maintain higher rates of photosynthesis and  
41 operate higher water and nitrogen use efficiencies than plants that use the ancestral C<sub>3</sub> cycle  
42 (Ghannoum et al., 2010). In C<sub>3</sub> species the inability of Ribulose 1,5-Bisphosphate  
43 Carboxylase/Oxygenase (RuBisCO) to completely distinguish between carbon dioxide (CO<sub>2</sub>) and  
44 oxygen (O<sub>2</sub>) leads to competing carboxylation and oxygenation reactions. As temperatures  
45 increase and water availability is reduced, the oxygenation activity of RuBisCO becomes more  
46 prevalent and so compromises photosynthetic efficiency (Lorimer, 1981; Sedelnikova et al., 2018).  
47 More than 60 lineages of land plants have convergently evolved C<sub>4</sub> photosynthesis and despite  
48 some variation in how they concentrate CO<sub>2</sub> in the leaf, in all cases the likelihood of O<sub>2</sub> reacting  
49 with RuBisCO at the active site of the enzyme is reduced and carbon and energy losses associated  
50 with photorespiration suppressed (Bowes et al., 1971; Hatch, 1987; Sage, 2004).

51 Most C<sub>4</sub> leaves possess Kranz anatomy, which consists of extensive vascularization combined  
52 with an inner wreath of bundle sheath cells and an outer ring of mesophyll cells (Haberlandt,  
53 1904; Langdale, 2011). In C<sub>4</sub> plants with this leaf anatomy, photosynthetic reactions are normally  
54 partitioned between mesophyll and bundle sheath cells. Atmospheric CO<sub>2</sub> is first converted to  
55 bicarbonate (HCO<sub>3</sub><sup>-</sup>) by Carbonic Anhydrase (CA) and then assimilated into a four-carbon acid by  
56 the O<sub>2</sub>-insensitive Phospho*eno*Pyruvate Carboxylase (PEPC) in mesophyll cells. Carbon is then  
57 shuttled as four-carbon acids to the bundle sheath cells where CO<sub>2</sub> is released by a C<sub>4</sub> acid  
58 decarboxylase. Three decarboxylases, NAD-dependent Malic Enzyme (NAD-ME), NADP-dependent  
59 Malic Enzyme (NADP-ME) and/or Phospho*eno*Pyruvate Carboxykinase (PEPCK) are known to  
60 operate in C<sub>4</sub> plants to release CO<sub>2</sub> for re-assimilation by RuBisCO in the Calvin-Benson-Bassham  
61 cycle (Hatch, 1987; Kagawa & Hatch, 1974; Y. Wang et al., 2014). The directional transport of  
62 organic acids from mesophyll to bundle sheath combined with bundle sheath-preferential  
63 accumulation of RuBisCO in C<sub>4</sub> plants ensure that RuBisCO operates under high CO<sub>2</sub> concentrations  
64 (Sage et al., 2012).

65 The recruitment of C<sub>4</sub> genes from the C<sub>3</sub> photosynthetic pathway required mechanisms that led  
66 to patterns of cell-preferential gene expression but also increased transcript levels (Hibberd &  
67 Covshoff, 2010; Langdale & Nelson, 1991). These two traits are likely to have evolved  
68 independently as they can be controlled by different *cis*-elements in the same gene (Akyildiz et al.,  
69 2007; Kajala et al., 2012; Marshall et al., 1997; Wiludda et al., 2012). Moreover, cell-preferential  
70 accumulation of C<sub>4</sub> enzymes can be specified at different levels of regulation (Gowik et al., 2004,  
71 2017; Heimann et al., 2013; Williams et al., 2016). For example, epigenetic regulation has been

72 documented in the C<sub>4</sub> monocotyledon *Zea mays* (maize) where mesophyll-preferential expression  
73 of *CA* and *PEPC* seems to be regulated by trimethylation of histone H3K4 at analogous gene  
74 positions (Heimann et al., 2013). Transcriptional control is also important in C<sub>4</sub> dicotyledons such  
75 as *Flaveria bidentis* and *Gynandropsis gynandra*. For example, in *F. bidentis* mesophyll-preferential  
76 expression of *PEPC* is transcriptionally controlled by *cis*-elements known as MEM1 and Mesophyll  
77 Enhancing Module 1-like (MEM1-like) respectively (Gowik et al., 2004, 2017), and in *G. gynandra*  
78 bundle sheath-preferential accumulation of NAD-ME1, NAD-ME2 and mitochondrial MDH is  
79 controlled by a pair of *cis*-elements that despite being exonic act transcriptionally (Reyna-Llorens  
80 et al., 2018). In *G. gynandra* post-transcriptional regulation is also important, with for example  
81 mesophyll-preferential accumulation of CA and Pyruvate, orthophosphate Dikinase (PPDK) being  
82 determined through the Mesophyll Expression Module 2 (MEM2) found in 5' and 3' untranslated  
83 regions (Williams et al., 2016). There is also evidence that translational regulation is important in  
84 maintaining cell-specific accumulation of PEPC in maize mesophyll cells, and of RuBisCO in maize  
85 and Amaranth bundle sheath cells (Berry et al., 1986, 1988; Chotewutmontri & Barkan, 2020;  
86 Wostrikoff et al., 2012).

87 Despite progress made in understanding global transcriptomic changes associated with the  
88 expression of C<sub>4</sub> genes between cell-types (Aubry et al., 2016; Chang et al., 2012; John et al.,  
89 2014b; Ponnala et al., 2014), across developmental gradients (Aubry et al., 2014; Kùlahoglu et al.,  
90 2014; Kùmpers et al., 2017) and in response to light (Hendron & Kelly, 2020) to our knowledge  
91 very little is known about the effect of photoperiod on cell-preferential gene expression in the C<sub>4</sub>  
92 leaf. To address this, we grew maize under controlled conditions, measured photosynthesis and  
93 performed RNA-sequencing from mesophyll and bundle sheath strands over a 24-hour time-  
94 course. Although growth conditions were constant, rates of photosynthesis and cell-preferential  
95 expression of C<sub>4</sub> genes varied during the photoperiod. In fact, the largest differences in C<sub>4</sub> cycle  
96 transcript abundance between mesophyll and bundle sheath cells was detected between six and  
97 ten hours after dawn, when rates of C<sub>4</sub> photosynthesis were highest. By integrating a DNA motif  
98 enrichment analysis with a gene co-expression network analysis, we identified transcription  
99 factors from DOF (DNA binding with One Finger) and MADS (M for MINICHROMOSOME  
100 MAINTENANCE FACTOR 1, A for AGAMOUS, D for DEFICIENS and S for Serum Response Factor)  
101 families as candidate regulators of bundle sheath-preferential expression. *Trans*-activation assays  
102 *in planta* confirmed the ability of these DOF and MADS transcription factors to activate promoter  
103 fragments of the bundle sheath preferential *NADP-ME* and *PEPCK* maize genes.

## 104 **Results**

### 105 **Rates of photosynthesis fluctuate under constant light and temperature**

106 Photosynthetic parameters of C<sub>4</sub> maize leaves exposed to constant light and temperature were  
107 determined 2, 6, 10 and 14 hours after dawn (Figure 1A-E).  $F_w/F_m$  values from dark-adapted leaves  
108 (Supplemental Table 1) were consistent with those expected from unstressed leaves (Demmig &  
109 Björkman, 1987). Despite light intensity being constant, statistically significant variations in  
110 assimilation rate were detected (Figure 1A; Supplemental Table 1) with the highest rates occurring  
111 ten hours after dawn. The chlorophyll fluorescence parameters  $\phi$ PSII and  $F_v'/F_m'$  that report on the  
112 operating efficiency of Photosystem II (PSII) and maximum efficiency of PSII without dark  
113 adaptation respectively showed slightly different dynamics with values stabilising from two hours  
114 after dawn (Figure 1B and 1C). Coincident with the variation in carbon fixation, stomatal  
115 conductance increased from dawn to ten hours (Figure 1D). The relative increase in stomatal  
116 conductance exceeded that of net CO<sub>2</sub> fixation, and as a result the intercellular CO<sub>2</sub> concentration  
117 in the leaf increased consistently over the entire fourteen hours of light (Figure 1E). Overall, these  
118 data reveal that without alterations in light intensity, photosynthetic parameters in C<sub>4</sub> maize  
119 fluctuate across the day, with higher CO<sub>2</sub> assimilation at ten hours after dawn (Figure 1A). The  
120 trend of increased CO<sub>2</sub> assimilation, stomatal conductance and intercellular concentration of  
121 carbon dioxide until ten hours after dawn contrasted with  $\phi$ PSII and  $F_v'/F_m'$  that peaked after only  
122 two hours of light (Figure 1A to 1E). To initiate a molecular investigation of processes associated  
123 with these alterations to C<sub>4</sub> photosynthesis over the photoperiod we assessed genome-wide  
124 patterns of transcript abundance in mesophyll and bundle sheath cells over a 24-hour period.

125

### 126 **Compartmentation of C<sub>4</sub> cycle gene expression varies during the day**

127 RNA was isolated from mesophyll and bundle sheath cells over a 24-hour period and subjected  
128 to deep sequencing. Samples were collected at 0, 2, 6, 10, 14, 18 and 22 hours after dawn in a 16 h  
129 photoperiod (Figure 2A). 88,521,792 reads were obtained per sample, of which 82% mapped to  
130 the maize reference genome B73 AGPv3 (Figure 2B). Quality control for reproducibility showed  
131 strong correlation between biological replicates (Pearson's  $r > 0.94$ , Supplemental Figure 1).  
132 Principal Component Analysis (PCA) showed that cell-type (mesophyll or bundle sheath) accounted  
133 for the first principal component and explained 45% of the variance (Figure 2C). Time of day was  
134 associated with the second principal component and accounted for 27% of the variance (Figure  
135 2C). This implies that transcript abundance in the maize leaf is influenced by both cell-type and  
136 time of day. To determine whether the spatial patterning of transcripts between mesophyll and

137 bundle sheath cells showed temporal dynamics, differential gene expression analysis was  
138 performed at each time-point. The maximum number of differentially expressed genes between  
139 these cell-types (12,572) was detected at 6 hours after dawn, whilst the minimum number (9,690)  
140 was observed at dawn (0 hrs) (Figure 2D; Supplemental Table 2).

141 Core components of the maize circadian oscillator changed over the time-course as would be  
142 expected from analysis of *C<sub>3</sub>* species. Maize orthologs for circadian oscillator components were  
143 defined using OrthoFinder (Emms & Kelly, 2019) using proteomes of *Arabidopsis thaliana* (*C<sub>3</sub>*) *Zea*  
144 *mays* (*C<sub>4</sub>*), *Oryza sativa* (*C<sub>3</sub>*), *Triticum aestivum* (*C<sub>3</sub>*), *Brachypodium distachyon* (*C<sub>3</sub>*), *Setaria italica*  
145 (*C<sub>4</sub>*) and *Sorghum bicolor* (*C<sub>4</sub>*) as input (Supplemental Figure 2A; Supplemental Table 3). Many  
146 circadian oscillator genes in *A. thaliana* had more than one ortholog in maize (Supplemental Table  
147 3), consistent with the multiple gene duplications in the maize lineage since it diverged from their  
148 last common ancestor (Lee et al., 2013). Specifically, Arabidopsis Pseudo-Response Regulator 7  
149 (PRR7, AT5G02810) had three orthologs in maize, hereafter referred to as PRR7.1  
150 (GRMZM2G005732), PRR7.2 (GRMZM2G033962) and PRR7.3 (GRMZM2G095727) (Supplemental  
151 Figure 2B). By contrast, Arabidopsis PRR3 (AT5G60100), PRR5 (AT5G24470), PRR9 (AT2G46790)  
152 and a CCT motif family protein (AT2G46670) were part of the same clade and shared two  
153 orthologs PRR3/5/9.1 (GRMZM2G179024) and PRR3/5/9.2 (GRMZM2G367834) in maize  
154 (Supplemental Figure 2C). As expected, maize circadian oscillator genes were expressed in  
155 temporal waves with *CCA1/LHY.1* and *CCA1/LHY.2* transcripts peaking six hours after dawn  
156 (Supplemental Figure 2D). The peak in *CCA1/LHY* transcript abundance was followed by sequential  
157 accumulation of *PRRs*. For example, transcripts of *PRR7.1* to *PRR7.3* accumulated between six and  
158 ten hours of light, and *PRR3/5/9.1* and *PRR3/5/9.2* peaked at ten and fourteen hours after dawn  
159 (Supplemental Figure 2D). A rise in abundance was then observed for the evening/night transcripts  
160 *LUX ARRHYTHMO* (*LUX*) and *TIMING OF CAB EXPRESSION 1* (*TOC1.1* to *TOC1.6*) such that they  
161 peaked two hours after the dark period (Supplemental Figure 2D). Despite *EARLY FLOWERING 3*  
162 (*ELF3*) being an evening component in *A. thaliana* (Nusinow et al., 2011) in maize *ELF3* transcript  
163 abundance was slightly higher during the day (Supplemental Figure 2D). This observation is  
164 consistent with previous observations showing *ELF3* peaking near dawn in sorghum, foxtail millet,  
165 rice and wheat (Zhao et al., 2012; Lai et al., 2020; Wittern et al., 2022). Notably, whilst most core  
166 components of the maize circadian oscillator appeared to be partitioned equally between the two  
167 cell-types, transcripts for *PRR7.1* to *PRR7.3* and *ELF3* were more abundant in bundle sheath cells  
168 across the day (Supplemental Figure 2D).

169 To investigate whether the circadian clock modulates  $C_4$  photosynthesis, we measured  
170 photosynthetic activity under one light-dark cycle followed by 72 hours of a light regime that  
171 consisted of 40 minutes light and 20 minutes darkness (Supplemental Figure 3). Rhythmic  
172 oscillations with near 24 h free running circadian periods were detected in the chlorophyll  
173 fluorescence parameters  $F_m$ ,  $F_v/F_m$ ,  $\phi$ PSII and  $F_v'/F_m'$  that report on the maximum yield of  
174 fluorescence, maximum quantum efficiency of PSII photochemistry, operating efficiency of PSII  
175 and maximum efficiency of PSII (empirical  $p$ -value < 0.01, Supplemental Figure 3A-D).  $\phi$ PSII and  
176  $F_v'/F_m'$  (Supplemental Figure 3C and 3D) showed similar dynamics to those observed in the dark-  
177 light cycle (Figure 1B and 1C) with higher values occurring between two and ten hours after dawn.  
178 The 24 h cycles of photosynthetic parameters in these conditions is indicative of circadian  
179 regulation. To define groups of genes with maximal transcript abundance at different times of day  
180 in each cell-type, k-means clustering was performed (Supplemental Table 4). This identified fifteen  
181 clusters of genes that were divided in five groups based on their peak in expression (Figure 3A;  
182 Supplemental Table 4). Of the fifteen clusters defined, three of them did not show a strong cell-  
183 specific profile (clusters 5, 9 and 11). On the other hand, we observed a clear separation of the  
184 clusters defined by the peaks of activity and cell type-preferential expression for the remaining  
185 twelve clusters (Figure 3A). To better understand these broad alterations in gene expression, Gene  
186 Ontology (GO) enrichment analysis was performed on each cluster (Supplemental Figure 4;  
187 Supplemental Table 5). Signalling cascades peaked early in the morning in both cell-types. Later  
188 on, transcripts associated with chloroplast organisation, photosynthesis and response to light  
189 peaked in mesophyll cells, whilst transport peaked in the bundle sheath. The activation of genes  
190 involved in transcription, translation, and protein metabolism was observed during the transition  
191 to the dark period (Supplemental Figure 4; Supplemental Table 5).

192 Clusters 3, 6, 7 and 15 contained transcripts that showed the most distinct differences in  
193 expression between mesophyll and bundle sheath cells (Figure 3B) and so we assessed the nature  
194 of genes encoding these transcripts. Cluster 15 contained genes preferentially expressed in the  
195 mesophyll throughout the diel time-course and was strongly enriched in biological processes such  
196 as chloroplast organisation, photosynthesis, plastid translation and porphyrin metabolism (Figure  
197 3B and 3C; Supplemental Table 5). In contrast, cluster 3 was bundle sheath-preferential and  
198 enriched GO terms included carbon fixation, carbohydrate metabolism, transport, and stomatal  
199 movement (Figure 3B and 3C; Supplemental Table 5). Interestingly, chloroplast organisation was  
200 also enriched in cluster 6 of mesophyll-preferential genes that peaked at six hours after dawn, and

201 cluster 7 that contained genes involved in carbohydrate metabolism and transport that were  
202 bundle sheath-preferential (Figure 3B and 3C; Supplemental Table 5).

203 Consistent with enrichment in the photosynthesis GO term, cluster 15 contained genes from  
204 both the core C<sub>4</sub> and Calvin-Benson-Bassham cycles [*PHOSPHOENOLPYRUVATE CARBOXYLASE*  
205 (*PEPC*), *ASPARTATE AMINOTRANSFERASE* from mesophyll (*AspAT (M)*) and  
206 *PYRUVATE, ORTHOPHOSPHATE DIKINASE (PPDK)* and *TRIOSEPHOSPHATE ISOMERASE (TPI)*]  
207 (Supplemental Table 6). Moreover, cluster 3 was enriched in C<sub>4</sub>-related genes [*NADP-DEPENDENT*  
208 *MALIC ENZYME (NADP-ME)*; *RIBULOSE 1,5-BISPHOSPHATE CARBOXYLASE/OXYGENASE ACTIVASE*  
209 (*RCA*), *FRUCTOSE-1,6-BISPHOSPHATASE (FBP)*, *TRANSKETOLASE (TKL)*, *RIBULOSE-PHOSPHATE3*  
210 *EPIMERASE (RPE)*, *SEDOHEPTULOSE-1,7-BISPHOSPHATASE (SBP)* and *PHOSPHORIBULOKINASE*  
211 (*PRK*)]. This was also the case for clusters 6 and 7 [with cluster 6 containing *CARBONIC ANHYDRASE*  
212 (*CA*); *GLYCERALDEHYDE 3-PHOSPHATE DEHYDROGENASE B SUBUNIT (GAPDH(B))*, and cluster 7  
213 containing *PHOSPHOENOLPYRUVATE CARBOXYKINASE (PEPCK)*; *RuBisCO SMALL SUBUNIT-3m*  
214 (*RBCS3m*), *GLYCERALDEHYDE 3-PHOSPHATE DEHYDROGENASE A SUBUNIT (GAPDH(A))* and  
215 *FRUCTOSE BISPHOSPHATE ALDOLASE (FBA)*] (Supplemental Table 6).

216 Transcript abundance of C<sub>4</sub> cycle genes in clusters 3, 6, 7 and 15 varied over the diel time-  
217 course and tended to peak during the light period (Figure 4A). Maximal transcript abundance of  
218 most C<sub>4</sub> cycle and also Calvin-Benson-Bassham cycle genes took place between six and ten hours  
219 of light (Figure 4A). Indeed, during the first ten hours of light there was a gradual increase in the  
220 statistical significance associated with the extent to which C<sub>4</sub> and Calvin-Benson-Bassham cycle  
221 transcript abundance was partitioned between mesophyll and bundle sheath cells (Figure 4B).  
222 Taken together these data reveal a striking variation in the extent to which C<sub>4</sub> photosynthesis  
223 genes are preferentially expressed in mesophyll or bundle sheath cells over the day.

224

## 225 **Members of the DOF and MADS-domain transcription factor families as regulators of bundle** 226 **sheath-preferential expression of C<sub>4</sub> and Calvin-Benson-Bassham cycle genes**

227 We next sought to use the RNA-seq time-course to identify *cis*-elements and *trans*-factors  
228 linked to the control of C<sub>4</sub> gene expression. Thus, to identify potential regulators in *cis* and *trans*  
229 of genes in clusters associated with the C<sub>4</sub> and Calvin-Benson-Bassham cycles (clusters 15, 6, 3 and  
230 7) we performed a motif enrichment analysis using a set of 259 DNA-binding motifs for *Z. mays*  
231 from the PlantTFDB (Jin et al. 2017); Figure 5A, Supplemental Figure 5, Supplemental Table 7). Of  
232 the motifs tested less than 10% were enriched in at least one of the four clusters (Fisher's exact  
233 test, p-value < 0.01, Supplemental Figure 5, Supplemental Table 7). Mesophyll-preferential clusters



234 were enriched in only three motifs. Whilst cluster 15 was enriched in the CPP-transcription factor  
235 1 (CPP1) motif, cluster 6 was enriched in G2-like-transcription factor 56 (GLK56) and MYB-  
236 transcription factor 138 (MYB138) motifs (Figure 5A; Supplemental Figure 5). The GLK56  
237 transcription factor is a known regulator of the circadian clock (Zhao et al., 2023), activating *CCA1*  
238 and being co-regulated with *TOC1*. *GLK56* expression peaked at 18 hrs similar to *TOC1* orthologs  
239 (Supplemental Figures 2D and 5). However, bundle sheath-preferential clusters showed a higher  
240 number of enriched motifs. Cluster 3 was enriched in DNA-binding One Zinc Finger 21 (DOF21) and  
241 MYB-transcription factor 14 (MYB14) motifs whilst cluster 7 showed enrichment in NLP-  
242 transcription factor 13 (NLP13), KNOTTED 1 (KN1), ABI3-VP1-transcription factor 19 (ABI19) and  
243 several members of the HSF and SBP transcription factor families (Figure 5A). Moreover, both  
244 clusters shared an enrichment for a pair of BBR motifs (BBR3 and BBR4) as well as motifs  
245 recognised by DNA-binding One Zinc Finger 2 (DOF2) and MADS-domain protein 1 (MADS1) (Figure  
246 5A; Supplemental Figure 5). This finding suggests that these transcription factors might contribute  
247 to bundle sheath-preferential gene expression across the day.

248 To further investigate links between enriched motifs and photosynthesis genes present in  
249 clusters 15, 6, 3 and 7, a gene co-expression network was built between the corresponding  
250 transcription factors and photosynthesis genes containing motif hits (Supplemental Figure 6).  
251 Although we started with the four clusters associated with either mesophyll or bundle sheath  
252 strands, for two reasons we focussed on those defined by bundle sheath-preferential expression  
253 (clusters 3 and 7). First, we did not detect any motif hits for photosynthesis genes present in  
254 mesophyll cluster 6. Second, poorly expressed transcription factors (Transcript Per Million reads <  
255 5) were removed and this meant that photosynthesis genes from cluster 15 were also no longer  
256 present in the network (Supplemental Figure 6). Pearson's correlation coefficient was used to  
257 define negative or positive co-expression between bundle sheath-preferential photosynthesis  
258 genes and candidate transcriptional regulators (Figure 5B). DOF2, MADS1 and DOF21 were  
259 positively co-expressed with bundle sheath-preferential photosynthesis genes in cluster 3 (*NADP-*  
260 *ME*, *TKL*, *PRK*, *RPE*, *RCA*, *FBP*, *SBP* and *FBA*) and cluster 7 (*RBCS3m* and *PEPCK*), whilst BBR4 and  
261 BBR3 showed negative co-expression correlation with these photosynthesis genes (Figure 5B,  
262 Supplemental Table 7). These relationships are underpinned by *MADS1* and *DOF21* being  
263 preferentially expressed in bundle sheath cells and peaking six hours after dawn, whilst *BBR3* and  
264 *BBR4* peaked towards the end of the light period and were preferentially expressed in mesophyll  
265 cells (Figure 5C). We therefore hypothesized that *MADS1* and *DOF21* act as positive transcriptional  
266 regulators of bundle sheath expressed genes whilst *BBR3* and *BBR4* act to repress these genes in

267 mesophyll cells. To initiate testing, a *trans*-activation assay in *Nicotiana benthamiana* was  
268 performed. Promoter fragments from the *NADP-ME*, *RBCS* and *PEPCK* genes containing the  
269 relevant motifs generated low levels of autoactivation (Figure 5D) and so we were not able to test  
270 for negative regulation by BBR3 and BBR4. However, the DOF2 and MADS1 transcription factors  
271 activated short promoter fragments of the *NADP-ME*, *PEPCK* and *RBCS* genes containing their  
272 cognate motifs (Figure 5D). The combined findings that DOF2 and MADS1 are co-expressed with C<sub>4</sub>  
273 genes, that their DNA binding sites are found in C<sub>4</sub> promoters, and that they *trans*-activate  
274 expression *in planta* indicate that these transcription factor families likely play a role in enhancing  
275 C<sub>4</sub> gene expression in the bundle sheath during the day.

## 276 Discussion

### 277 Variation in the rate of C<sub>4</sub> photosynthesis over the day is influenced by circadian oscillations

278 Our analysis shows that under moderate illumination and a constant light regime similar to  
279 those used in *A. thaliana*, barley and wheat to study circadian oscillations (Dakhiya et al., 2017;  
280 Litthauer et al., 2015, 2016; Wittern et al., 2022) photosynthetic rates vary in maize. These  
281 findings are therefore consistent with the fact that photosynthesis in C<sub>3</sub> species is modulated by  
282 the circadian oscillator (Dodd et al., 2005) and our analysis of chlorophyll fluorescence quenching  
283 in maize supports this notion. The circadian oscillator also regulates stomatal conductance in C<sub>3</sub>  
284 and C<sub>4</sub> leaves (Resco de Dios & Gessler, 2018). Consistent with the circadian regulation of stomatal  
285 conductance and photosynthetic efficiency as has been reported in C<sub>3</sub> species (Dodd et al., 2005;  
286 Harmer et al., 2000) fourteen hours after dawn all photosynthetic parameters except intercellular  
287 concentration of carbon dioxide appeared to decline. In this study, CO<sub>2</sub> assimilation and stomatal  
288 conductance followed a different trajectory compared with  $\phi$ PSII and  $F_v'/F_m'$ , with the former  
289 reaching maximum values at ten hours and the latter at two hours after dawn. This apparent  
290 increase in rates of CO<sub>2</sub> assimilation during the day compared with activity of the photosystems,  
291 could be because the carbon concentrating mechanism operating in maize is not completely CO<sub>2</sub>-  
292 saturated before ten hours. If this is the case, stomatal opening over the day would allow  
293 increased intercellular concentration of carbon dioxide and thus higher CO<sub>2</sub> assimilation. It is also  
294 possible that the efficiency of carbon assimilation rises during the day, and stomata respond to  
295 this to maintain CO<sub>2</sub> supply. A third possibility is that at dawn C<sub>4</sub> photosynthesis operates  
296 exclusively with NADP-ME for decarboxylation. As the day progresses, the sustained activity of PSII  
297 provides sufficient NADPH in the bundle sheath for PEPC to act as a second decarboxylase. These  
298 hypotheses could be mediated by modifications to the transcriptional activity of genes involved in  
299 the C<sub>4</sub> pathway.

300

### 301 Compartmentation of C<sub>4</sub> gene expression between mesophyll and bundle sheath varies over the 302 day

303 Over the light and dark period we detected statistically significant variance in transcript  
304 abundance in mesophyll and bundle sheath strands. Although the main factor explaining this was  
305 associated with preferential accumulation of transcripts to either the mesophyll or bundle sheath,  
306 time of day also had a significant effect. Thus, although C<sub>4</sub> cycle transcripts are differentially  
307 expressed between the two cell-types (Chang et al., 2012; Li et al., 2010; Tausta et al., 2014), this  
308 compartmentation is more dramatic at midday prior to the highest rates of photosynthesis.

309 Differences in transcript abundance between the two cell-types were associated with the  
310 mesophyll being biased towards strong expression of components of the photosynthetic electron  
311 transport chain as well as responses to far red, red, and blue light. In contrast, GO terms over-  
312 represented in the bundle sheath were involved in carbon fixation and transport. These findings  
313 are consistent with the fact that maize mesophyll cells contain both Photosystems I and II whilst  
314 bundle sheath strands contain RuBisCO and fail to accumulate significant amounts of Photosystem  
315 II (Meierhoff & Westhoff, 1993). Not only did transcripts encoding components of the core  
316 photosynthetic apparatus vary in the extent to which they were compartmented between  
317 mesophyll and bundle sheath cells, but this was also the case for transcripts associated with signal  
318 transduction pathways and stomatal movement. In both cases their transcripts tended to peak  
319 prior to those associated with carbon fixation.

320

### 321 **The role of MADS-domain and DOF transcription factors in activation of C<sub>4</sub> genes in the bundle** 322 **sheath**

323 In addition to biological processes being enriched in either mesophyll or bundle sheath strands  
324 and the extent of this being time of day-dependent, we observed spatiotemporal changes to  
325 transcripts encoding multiple transcription factor families. To better understand how  
326 transcriptional regulators control the expression of C<sub>4</sub> and Calvin-Benson-Bassham cycle genes, we  
327 performed a motif enrichment analysis on photosynthesis genes followed by a gene co-expression  
328 analysis between photosynthesis genes that showed enrichment in DNA-binding motifs and their  
329 target transcription factors. This predicted that shared *cis*-elements and *trans*-factors control  
330 bundle sheath-specificity of genes from both the C<sub>4</sub> and Calvin-Benson-Bassham cycles, which  
331 might ensure spatial and temporal coordination between these two photosynthetic cycles.  
332 Although to our knowledge the specific *cis*-elements and transcription factors identified here have  
333 not previously been implicated in controlling C<sub>4</sub> photosynthesis, there are several reports showing  
334 that multiple C<sub>4</sub> genes can be regulated by the same process. For example, mesophyll-specific  
335 expression of *PEPC* and *CA* in *Flaveria bidentis* and bundle sheath-specific expression of *NAD-ME1*,  
336 *NAD-ME2* and mitochondrial *MDH* in *Gynandropsis gynandra* are regulated by pairs of *cis*-  
337 elements with high sequence homology (Gowik et al., 2004, 2017) (Reyna-Llorens et al., 2018).  
338 Moreover, *PEPC* and *CA* are co-ordinately regulated by trimethylation of histone H3K4 (Heimann  
339 et al., 2013). A comparative analysis of transcriptomes from rice and maize leaf developmental  
340 gradients predicted 118 transcription factors as candidate regulators of C<sub>4</sub> gene expression (Wang  
341 et al., 2014). Amongst these, ZmMYB138 and ZmSBP6 were also predicted by our pipeline to

342 regulate mesophyll- and bundle sheath-preferential clusters of genes respectively. Our analysis  
343 also identified three positive (ZmDOF2, ZmMADS1 and ZmDOF21) and two negative regulators  
344 (ZmBBR3 and ZmBBR4) as strong candidates for determining preferential expression of  
345 photosynthesis genes in the bundle sheath. In the analysis of rice and maize transcriptomes (Wang  
346 et al., 2014), DOF-binding *cis*-elements (WAAAG; W = T/A) were also enriched in bundle sheath-  
347 specific genes and it was proposed that they have been recruited from the ancestral C<sub>3</sub> state to  
348 drive bundle sheath-specific expression. Different predictions from the two studies are likely  
349 explained by the nature of the transcriptomic datasets used. For example, it is possible that  
350 analysis of transcriptomes from rice and maize (Wang et al., 2014) identified regulators that  
351 establish differences between the C<sub>3</sub> and C<sub>4</sub> systems, whereas the sampling strategy in our case  
352 was able to predict genes that maintain and fine-tune cell-preferential gene expression over the  
353 photoperiod.

354 In maize the C<sub>4</sub> acid decarboxylases NADP-ME and PEPCK drive malate and aspartate  
355 metabolism in bundle sheath cells as sources of CO<sub>2</sub> for RuBisCO in the Calvin-Benson-Bassham  
356 cycle (Chang et al., 2012; P. Li et al., 2010; Tausta et al., 2014). Our understanding of how *NADP-*  
357 *ME* and *PEPCK* genes are transcriptionally regulated in C<sub>4</sub> plants is limited. To date, only  
358 ZmbHLH128 and ZmbHLH129 were shown to bind the maize *NADP-ME* promoter *in vivo* (Borba et  
359 al., 2018; Schlüter & Weber, 2020). Our pipeline identified DOF2 as a candidate activator of diel  
360 and bundle sheath-preferential expression of *NADP-ME*, and MADS1 as an activator of *PEPCK* and  
361 *RBCS*. Transactivation assays confirmed interaction between these transcription factors and  
362 promoters of the C<sub>4</sub> genes *in planta*. Notably, DOF2 in maize has previously been shown to repress  
363 transcription of the C<sub>4</sub> *PEPC* gene (Yanagisawa, 2000; Yanagisawa & Sheen, 1998). Our findings  
364 therefore suggest that maize DOF2 plays a dual-function in the regulation of C<sub>4</sub> genes in bundle  
365 sheath cells through repression of *PEPC* and activation of *NADP-ME*. Despite transcription factors  
366 often being classified as ‘activators’ or ‘repressors’, some can have both roles depending on the  
367 *cis*-regulatory element to which they bind, the structure of the surrounding chromatin, protein  
368 post-translational modifications and interaction with other proteins (Boyle & Després, 2010).

369 The work reported here extends our understanding of C<sub>4</sub> regulation. For example, the diel and  
370 spatial patterning of *RBCS* in C<sub>4</sub> is well-characterised and known to be controlled by multiple levels  
371 of gene regulation, including transcriptional and post-transcriptional (Berry et al., 1986; Borello et  
372 al., 1993; Giuliano et al., 1988; M. Patel et al., 2004; Minesh Patel et al., 2006; Xu et al., 2001). In  
373 maize the *RBCS* gene is transcriptionally regulated by two independent *cis*-elements present in  
374 untranslated regions (UTRs). In the 5' UTR an I-box is essential for light-mediated activation

375 (Giuliano et al., 1988) whilst in the 3' UTR a HOMO motif, which binds the Transcription Repressor-  
376 Maize 1 protein, drives mesophyll-repression (Xu et al., 2001). The data presented here identify  
377 MADS1 as an additional regulatory element associated to the diel expression of *RBCS*. It seems  
378 likely that MADS1 activates *RBCS* gene expression in bundle sheath cells as both are positively co-  
379 expressed with *MADS1* and *RBCS* peaking at six hours and ten hours after dawn respectively.  
380 Combined with previous findings, our data therefore suggest that bundle sheath-preferential  
381 expression of *RBCS* is achieved through HOMO-mediated repression of *RBCS* transcription in  
382 mesophyll (Xu et al., 2001) combined with MADS1-mediated activation of *RBCS* in bundle sheath.

383 More broadly, our findings are consistent with previous knowledge that MADS-domain  
384 transcription factors are key components of genetic regulatory networks involved in plastic  
385 developmental responses in plants (Castelán-Muñoz et al., 2019). MADS1 also enhanced  
386 expression of *PEPCK* and so it seems likely, that as with *RBCS*, *PEPCK* requires additional regulatory  
387 elements to allow modulation of cell-preferential gene expression and induction by light. In  
388 summary, we report that in maize the extent to which  $C_4$  genes are expressed in either mesophyll  
389 cells or bundle sheath strands varies during the day. The distinct dynamics of transcript abundance  
390 between the two cell-types allowed us to undertake a gene co-expression analysis that together  
391 with *trans*-activation assays *in planta* showed that DOF2 and MADS1 act as transcriptional  
392 activators of diel and bundle sheath-preferential expression of  $C_4$  genes. It was also noticeable  
393 that cell-preferential expression of  $C_4$  genes either preceded or were coincident with maximum  
394 rates of photosynthesis.

## 395 **Materials and Methods**

### 396 **Growth conditions and photosynthetic measurements**

397 *Zea mays* L. var. B73 plants were grown in M3 High Nutrient soil (Levington Advance) fertilised  
398 with 1 g L<sup>-1</sup> Osmocote, under 16-hours light photoperiod, 26°C day and night, 55% relative  
399 humidity and ambient carbon dioxide (CO<sub>2</sub>) concentration. A light-emitting diode (LED) panel  
400 provided light at ~500 μmol m<sup>-2</sup> s<sup>-1</sup> Photosynthetic Photon Flux Density. Fully expanded third  
401 leaves of 10-day-old maize plants were used for all analyses.

402 CO<sub>2</sub> assimilation and chlorophyll fluorescence of fourteen 10-day-old maize third leaves were  
403 measured simultaneously with a portable gas-exchange system LI-6800 (LI-COR Biosciences)  
404 equipped with a Fluorometer head 6800-01 A (LI-COR Biosciences). Leaves were first equilibrated  
405 at 400 ppm CO<sub>2</sub>, an irradiance of 500 μmol m<sup>-2</sup> s<sup>-1</sup>, red-blue actinic light (90%/10%), leaf  
406 temperature 25°C, 15 mmol mol<sup>-1</sup> H<sub>2</sub>O, and a flow rate 500 μmol s<sup>-1</sup>. Effective quantum yield of  
407 Photosystem II (ϕPSII) was probed simultaneously with the gas-exchange measurements under  
408 red-blue actinic light (90%/10%) using a multiphase saturating flash routine (Loriaux et al., 2013)  
409 with phase 1 and 3 at 8000 μmol m<sup>-2</sup> s<sup>-1</sup>. Maize leaves were dark-adapted for 4 hours prior to  
410 obtaining  $F_o$  and  $F_m$ , the minimal and maximal levels of fluorescence, respectively.

411 For measurements of chlorophyll fluorescence in diel and constant light and temperature, (26°C  
412 day and night/subjective night), fragments of six 10-day-old maize third leaves were excised and  
413 placed into individual wells of a black 96-well imaging plate (Greiner) filled with of 0.8% (w/v)  
414 bactoagar, ½ MS, 0.5 μM 6-benzyl-aminopurine adjusted to pH5.7 with 0.5 M KOH and 0.5 M HCl.  
415 The plate of leaf fragments was then moved to a CFimager (Technologica Ltd) and allowed to  
416 acclimate under 100 μmol m<sup>-2</sup> s<sup>-1</sup> blue light until dusk when lights were switched off. At dawn of  
417 the following day a light regime was used to capture ‘day’ images which consisted of 20 minutes  
418 darkness; 800 ms saturating pulse of 6172 μmol m<sup>-2</sup> s<sup>-1</sup> blue light, 40 minutes blue light at  
419 irradiance 100 μmol m<sup>-2</sup> s<sup>-1</sup>, 800 ms saturating pulse of 6172 μmol m<sup>-2</sup> s<sup>-1</sup> blue light, which was  
420 repeated every hour. After 16 hours the blue light source was switched off and a single 800 ms  
421 saturating pulse of 6172 μmol m<sup>-2</sup> s<sup>-1</sup> blue light was applied once per hour to capture “night”  
422 images. At dawn of the next day this repeating light regime was run continuously for a further 72  
423 hours to simulate constant light but with dark breaks to allow imaging as has been used previously  
424 (Wittern et al., 2023). Chlorophyll fluorescence parameters were calculated using the image  
425 scripts provided by the manufacturer. The empirical  $p$ -values and free running period estimates  
426 associated with each parameter were calculated from linear detrended data collected between

427 timepoints 48-96 hours in repeating light using the meta.meta function in the MetaCycle R-  
428 package (Wu et al., 2016).

429

### 430 **Mesophyll and bundle sheath strand isolation, RNA extraction and sequencing**

431 Fully expanded segments of 10-day-old maize third leaves were harvested at 0, 2, 6, 10, 14, 18  
432 and 22 hours across the photoperiod. The top 0.5 cm of each leaf was discarded, and the midrib  
433 removed. Mesophyll extracts were isolated as described previously by Covshoff, Furbank,  
434 Leegood, & Hibberd (2013) and bundle sheath strands according to Markelz, Costich, & Brutnell  
435 (2003) and John, Smith-Unna, Woodfield, Covshoff, & Hibberd (2014). Three replicates of six  
436 leaves each were initially rolled to extract mesophyll sap and then blended to isolate bundle  
437 sheath strands. Mesophyll sap was rapidly collected and deposited into RLT lysis buffer for RNA  
438 extraction (RNeasy Plant Mini Kit, Qiagen). Excess moisture was removed of the purified bundle  
439 sheath strands on a bed of paper towel. Bundle sheath strands were flash frozen in liquid nitrogen  
440 and stored at -80°C prior to RNA extraction.

441 Total RNA was extracted from three independent samples of mesophyll- and bundle sheath-  
442 enriched tissues collected at seven time-points (42 samples) using RNeasy Plant Mini Kit (Qiagen).  
443 To eliminate residual genomic DNA, the RNA was treated with TURBO DNA-free kit (Ambion)  
444 following the manufacturer's instructions. Initial quality control of total RNA was performed by a  
445 photometric measurement on a NanoDrop 1000 device. This was followed by RQN determination  
446 via a Fragment Analyzer System (AATI) using the DNF-471 standard sensitivity RNA Assay. Final  
447 RNA quantification was performed by a fluorometric Qubit assay (RNA HS, ThermoFisher  
448 Scientific). Library preparation was carried out on a PerkinElmer Sciclone NGS robotics unit using  
449 the Illumina TruSeq stranded mRNA sample Preparation Kit (#15031047 Rev.E) following the  
450 manufacturer's instructions. Input amount of total RNA was 200 ng. Final libraries were passed  
451 through an additional bead clean-up step in a 1:1 ratio (sample/beads) to remove primer dimers.  
452 Quality control on a Fragment Analyzer System (AATI) was used to determine fragment length  
453 distribution using the DNF-474 Assay. For quantification purposes, a fluorometric Qubit dsDNA HS  
454 Assay Kit was used. Libraries were diluted to 2 nM prior to equimolar pooling into 6 separate pools  
455 which were then each sequenced on individual flow cell lanes. Paired-End sequencing with a  
456 2x150 bp read length was performed on an Illumina HiSeq3000 system using the HiSeq 3000/4000  
457 PE Cluster Kit (PE-410-1001) and the HiSeq 3000/4000 SBS Kit 300 cycles (FC-410-1003). Clustering  
458 and sequencing were carried out following to the manufacturer's instructions. Library preparation



459 and sequencing were done at the Genomics and Transcriptomics Labor of the University of  
460 Düsseldorf.

461

#### 462 **Read assembly, annotation, and quantification of transcript abundance**

463 Reads were mapped to the *Zea mays* B73 genome AGPv3 (from Ensembl Plants,  
464 <http://plants.ensembl.org>) and quantified as Transcripts per Million (TPM) (Wagner et al., 2012)  
465 using RSEM version 1.2.23 with default settings (B. Li & Dewey, 2011) in conjunction with Bowtie 1  
466 (Langmead et al., 2009). Differential expression analysis was performed using the DESeq2 R  
467 package (Love et al., 2014) with read counts used as input. Cell-type was treated as condition  
468 (mesophyll vs. bundle sheath). Benjamini-Hochberg corrected  $p$ -value was set to  $< 0.01$  to identify  
469 differentially expressed genes (Supplemental Table 2) (Benjamini & Hochberg, 1995).

470

#### 471 **Data analysis and visualisation**

472 Data analysis was performed using R (R Development Core Team, 2009) unless stated  
473 otherwise. The R package ggplot2 (Wickham, 2009) was used to generate all graphs. Principal  
474 Component Analysis was performed on the mean of transcriptome triplicates of mesophyll and  
475 bundle sheath samples collected at 0, 2, 6, 10, 14, 18, and 22 hours. The Pearson's correlation  
476 coefficient was calculated between transcriptomes of three biological replicates from mesophyll  
477 and bundle sheath samples. K-means clustering was performed on expressed genes (TPM  $> 5$ ).  
478 Genes were quantile normalized and transformed to Z-score values. A total of fifteen centres were  
479 selected based on the total within sum of squares. Gene Ontology (GO) term enrichment analysis  
480 was performed using AgriGO v2 [GO analysis toolkit and database for agricultural community (Tian  
481 et al., 2017)] with the following settings: statistical test method – Fisher; Multi-test adjustment  
482 method – Hochberg (FDR); gene ontology type – Complete GO. A False Discovery Rate cutoff of  $\leq$   
483 0.01 was set to identify significantly enriched GO terms in clusters of co-expressed genes (detailed  
484 in Supplemental Table 4).

485 Genes encoding maize transcription factors were downloaded from PlantTFDB v4.0 [2331  
486 genes, <http://planttfdb.cbi.pku.edu.cn>, (Jin et al., 2017)] and Grassius [2605 genes,  
487 <http://www.grassius.org>, (Yilmaz et al., 2009)]. Only the 2110 genes present in both databases  
488 were considered in further analyses. Maize genes encoding transcription factors were assigned  
489 into families according to PlantTFDB v4.0. Motif enrichment analysis across genes was performed  
490 for each cluster using the “Analysis of Motif Enrichment” tool from the MEME suite (Bailey et al.,  
491 2009; McLeay & Bailey, 2010) using default parameters. For each transcript present in a particular

492 cluster, promoter sequences (-2kb to +0.5kb from the transcription start site) were retrieved and  
493 used as input. Control sequences were defined as the entire set of sequences (all clusters) minus  
494 those sequences present in the cluster of interest. Gene co-expression network was built using  
495 Cytoscape (Shannon et al., 2003).

496 Maize orthologs were identified for circadian clock genes from *Arabidopsis thaliana* using  
497 OrthoFinder (Emms & Kelly, 2019) including the proteomes of seven representative plant species  
498 (*Arabidopsis thaliana*, *Oryza sativa*, *Triticum aestivum*, *Brachypodium distachyon*, *Setaria italica*,  
499 *Sorghum bicolor* and *Zea mays*). Proteomes were downloaded from the ENSEMBL website  
500 ([www.ensembl.com](http://www.ensembl.com)). Phylogenetic trees were generated using Dendroscope  
501 ([www.dendroscope.org](http://www.dendroscope.org); Huson, Rupp, Berry, Gambette, & Paul, 2009).

502

### 503 **Trans-activation assays *in planta***

504 Constructs were generated using Golden Gate cloning as described in Supplemental Table 8.  
505 Coordinates of the *NADP-ME* (GRMZM2G085019) and *PEPCK* (GRMZM2G001696) promoters (1.5  
506 Kb upstream of the translation start site) enriched in DOF2 and MADS1 motifs, respectively, were  
507 retrieved from the motif enrichment analysis. For the *trans*-activation assays with the *NADP-ME*  
508 promoter, two fragments of 106 bp that contain a 6 bp-DOF2 motif ('aaagcc' in *NADP-MEa* and  
509 'ggcttt' in *NADP-MEb*) flanked by 50 bp-endogenous promoter sequence either side of the motif  
510 were cloned upstream of a minimal 35S promoter (Supplemental Table 8). For the *PEPCK*  
511 promoter, one fragment of 121 bp that contain a 21 bp-MADS1 motif ('tttctttctttgttctccgc')  
512 flanked by 50 bp-endogenous promoter sequence either side of the motif was cloned upstream of  
513 a minimal 35S promoter (Supplemental Table 8). For the *RBCS* promoter, one fragment of 121 bp  
514 that contained a 21 bp-MADS1 motif ('aaacgaaaaaataacaaca') flanked by 50 bp-endogenous  
515 promoter sequence either side of the motif was cloned upstream of a minimal 35S promoter  
516 (Supplemental Table 8). 106 bp-*pNADP-MEa*: -586 to -692 bp upstream of the translation start site  
517 with the 6 bp-DOF2 motif ('aaagcc') at -636 to -642 bp upstream of the translation start site; 106  
518 bp-*pNADP-MEb*: -112 to -218 bp upstream of the translation start site with the 6 bp-DOF2 motif  
519 ('ggcttt') at -162 to -168 bp upstream of the translation start site; 121 bp-*pPEPCK*: -815 to -936 bp  
520 upstream of the translation start site with the 21 bp-MADS1 motif ('tttctttctttgttctccgc') at -865  
521 to -886 bp upstream of the translation start site; 121 bp-*pRBCS*: -1089 to -968 bp upstream of the  
522 translation start site with the 21bp-MADS1 motif ('aaacgaaaaaataacaaca') at -1039 to -1018 bp  
523 upstream of the translation start site. Level 1 constructs were made such that these promoter  
524 fragments were placed upstream of the GUS reporter gene. To produce level 2 constructs, these

525 were combined with a transformation control containing the LUCIFERASE reporter driven by the  
526 constitutive *NOS* promoter, the transcription factor of interest driven by the constitutive *LjUBI*  
527 promoter and the P19 silencing suppressor under control of the *CaMV35S* promoter. Constructs  
528 were transformed into the *Agrobacterium tumefaciens* strain GV3101. Overnight cultures of *A.*  
529 *tumefaciens* were pelleted and resuspended in infiltration buffer [10 mM MES (pH 5.6), 10 mM  
530 MgCl<sub>2</sub>, 150 μM acetosyringone] to an optical density of 0.3. Cultures were then incubated for 2  
531 hours at room temperature and infiltrated into the abaxial side of leaves of four-week-old  
532 *Nicotiana benthamiana* plants with 1 mL syringe. Leaf discs from the infiltrated regions were  
533 sampled 48 hours after infiltration and flash frozen in liquid nitrogen. Protein for the 4-  
534 methylumbelliferyl-b-D-glucuronide (MUG) and luciferase (LUC) assays was extracted in 1x passive  
535 lysis buffer (PLB: Promega). MUG assays were performed by adding 40 mL of protein extract to  
536 100 mL of MUG assay buffer [2 mM MUG, 50 mM NaH<sub>2</sub>PO<sub>4</sub> /Na<sub>2</sub> HPO<sub>4</sub> buffer (pH 7.0), 10 mM  
537 EDTA, 0.1% (v/v) Triton X-1000, 0.1%(w/v) sodium lauroyl sarcosinate, 10 mM DTT]. Stop buffer  
538 (200 mM Na<sub>2</sub>CO<sub>3</sub>) was added at 0 and 120 minutes, and the rate of MUG accumulation was  
539 measured in triplicate on a plate reader (CLARIOstar, BMG lab tech) with excitation at 360 nm and  
540 emission at 465 nm. LUC activity was measured with 20 mL of protein sample and 100 mL of LUC  
541 assay reagent (Promega). Promoter activation was calculated as (rate of MUG accumulation / LUC  
542 luminescence) x 100.

543

#### 544 **Accession numbers**

545 All referenced gene names and accessions are detailed in Supplemental Tables 2, 3, 4 and 6.  
546 RNA-sequencing data generated in this study have been deposited to the National Center for  
547 Biotechnology Information Sequence Read Archive with accession number PRJNA635519.

548

#### 549 **Acknowledgements**

550 We thank André M. Cordeiro, Bruno Alexandre and Joana Rodrigues (ITQB-NOVA, Oeiras,  
551 Portugal) for helping in mesophyll and bundle sheath cell isolation. This work was supported by  
552 the European Union project *3to4* (Grant agreement no: 289582). By Fundação para a Ciência e  
553 Tecnologia (FCT) through research unit GREEN-it 'Bioresources for Sustainability'  
554 (UID/Multi/04551/2013, UIDB/04551/2020, UIDP/04551/2020). A.R.B. (SFRH/BD/105739/2014),  
555 A.M.G. (SFRH/BD/89743/2012) and N.J.M.S. (IF/01126/2012 – POPH-QREN). By ERACAPS grant  
556 C4BREED and BBSRC grants BB/L014130, BB/P0031171 and BB/S006370/1. By ERC Grant  
557 Revolution RG80867. For the purpose of open access, the authors have applied a Creative

558 Commons Attribution (CC BY) licence to any Author Accepted Manuscript version arising from this  
559 submission.

560

561 A.R.B., I.R-L., J. K., A.A.R.W., N.J.M.S. and J.M.H. conceptualised the experiments. A.R.B., I.R-L. and  
562 G.S. performed photosynthetic measurements. A.R.B., P.G., A.G. and N.J.M.S isolated mesophyll  
563 and bundle sheath cells. A.R.B., I.R-L. and P.J.D. conducted data analysis. A.R.B. and P.J.D.  
564 performed trans-activation assays *in planta*. A.R.B., I.R-L. and J.M.H. wrote the article and  
565 prepared the figures.

566 **Figure legends**

567 **Figure 1. Photosynthetic efficiency in maize fluctuates across the photoperiod.** A-E) Violin plots  
568 and boxplots showing photosynthetic parameters of light-adapted leaves during constant light and  
569 temperature. A) CO<sub>2</sub> assimilation (A) rate. B) Operating efficiency of Photosystem II ( $\phi$ PSII). C)  
570 Maximum efficiency of PSII photochemistry in the light ( $F_v'/F_m'$ ). D) Stomatal conductance ( $g_{sw}$ ) to  
571 water vapour. E) intercellular CO<sub>2</sub> concentration ( $C_i$ ). Boxplot tails indicate 95% confidence  
572 intervals and different letters denote statistically significant differences between time-points  
573 determined by One-way repeated measures ANOVA, Tukey test ( $p \leq 0.05$ ,  $n = 14$  biological  
574 replicates). Each datapoint represents one biological replicate. Black and white bars in the x-axis  
575 denote dark and light periods respectively.

576

577 **Figure 2. Maize mesophyll and bundle sheath transcriptomes over a diel time-course.** A)  
578 Mesophyll and bundle sheath transcriptomes were collected over 24-hours. White and black bars  
579 denote light and dark periods respectively. B) Transcriptome sequencing parameters. C) Principal  
580 Component Analysis of mesophyll and bundle sheath transcriptomes. Principal Component (PC) 1  
581 and PC2 explain 45% and 27% of data variance, respectively. D) Number of differentially expressed  
582 genes (DEGs) between mesophyll and bundle sheath cells at each time-point: up-regulated in  
583 mesophyll [ $\log_2(M/BS) > 0$ ] or bundle sheath [ $\log_2(M/BS) < 0$ ] (DESeq2 differential expression  
584 testing with multiple test corrected  $p$ -adj  $< 0.01$ ). M and BS represent mesophyll and bundle  
585 sheath cells, respectively.

586

587 **Figure 3. Gene Ontology terms associated with time of day and cell type in the maize leaf.** A)  
588 Heatmap illustrating profiles of transcript abundance of co-expressed genes in mesophyll and  
589 bundle sheath cells across the diel time-course. Clusters are grouped based on the time they peak  
590 (from dawn to 2 hours of light, 6 to 10 hrs, 14 to 22 hrs, dawn and 22 hrs, and dawn to 22 hrs). x-  
591 axis represents time and y-axis Z-score. High to low Z-score values are shown as pink to green. B)  
592 Line plots representing the diel transcript abundance profile of clusters 15, 3, 6 and 7 in mesophyll  
593 and bundle sheath cells across the diel time-course. Thick lines denote the mean of Z-score values  
594 in mesophyll or bundle sheath. The x-axis represents time-points and the y-axis Z-score values.  
595 White and black bars in the x-axis denote light and dark periods, respectively. C) Dot plot showing  
596 the twenty categories of biological processes with highest significance for clusters 15, 3, 6 and 7  
597 (FDR  $\leq 0.01$ ). Gene ratio represents the proportion of genes assigned to a functional category in a  
598 cluster. M and BS represent mesophyll and bundle sheath cells, respectively.

599

600 **Figure 4. Cell specificity of C<sub>4</sub> cycle and Calvin-Benson-Bassham cycle transcripts oscillates over**  
601 **the time-course.** A) C<sub>4</sub> genes and Calvin-Benson-Bassham cycle (CBB) genes present in clusters 15,  
602 3, 6 and 7. x-axis depicts time and y-axis shows transcript abundance in Transcripts Per Million  
603 (TPM). White and black bars denote light and dark periods. Gene names are followed by cluster  
604 number in parentheses. B) Volcano plots showing the distribution of adjusted *p*-values in relation  
605 to the fold-change between mesophyll and bundle sheath cells. Purple and orange circles denote  
606 C<sub>4</sub> and Calvin-Benson-Bassham cycle genes respectively and grey datapoints the remaining  
607 transcriptome.

608

609 **Figure 5. Motifs and transcription factors associated with cell-preferential gene**  
610 **expression.** A) Four clusters were selected for analysis. DNA-binding motifs enriched in mesophyll  
611 clusters 15 and 6, or bundle sheath clusters 3 and 7. B) Heatmap illustrating Pearson's correlation  
612 coefficient (PCC) values for bundle sheath-preferential photosynthesis genes in clusters 7 and 3  
613 and candidate transcriptional regulators. DNA-binding One Zinc Finger 2 (DOF2),  
614 GRMZM2G009406; MADS-domain protein 1 (MADS1), GRMZM2G171365; DNA-binding One Zinc  
615 Finger 21 (DOF21), GRMZM2G162749; Dwarf Plant 8 (D8), GRMZM2G144744; NLP-transcription  
616 factor 13 (NLP13), GRMZM2G053298; BBR/BCP-transcription factor 4 (BBR4),  
617 GRMZM2G118690; BBR/BCP-transcription factor 3 (BBR3), GRMZM2G164735. C) Line plots of diel  
618 transcript abundance for candidate regulators of bundle sheath-preferential photosynthesis  
619 genes. x-axis shows time and y-axis Z-score. White and black bars in the x-axis denote light and  
620 dark periods, respectively. M and BS represent mesophyll and bundle sheath cells. MADS-domain  
621 protein 1 (MADS1), GRMZM2G171365; DNA-binding One Zinc Finger 21 (DOF21),  
622 GRMZM2G162749; DNA-binding One Zinc Finger 2 (DOF2), GRMZM2G009406; BBR/BCP-  
623 transcription factor 3 (BBR3), GRMZM2G164735; BBR/BCP-transcription factor 4 (BBR4),  
624 GRMZM2G118690. D) Box plots showing promoter activation of bundle sheath-preferential genes  
625 *NADP-ME* (cluster 3), *PEPCK* (cluster 7) and *RBCS* (cluster 7) by transcription factors DOF2 and  
626 MADS1. Different letters represent statistically significant differences ( $P < 0.05$ ) as determined by  
627 two-sided, pairwise t-tests.  $n=6$  for  $pNADMEa$ ,  $pRBCS$  and  $pRBCS+MADS1$ ,  $n=5$  for  $pNADPMEb$  and  
628  $pPEPCK$ ,  $n=4$  for  $pNADMEa+DOF2$  and  $pPEPCK+MADS1$  and  $n=3$  for  $pNADMEb+DOF1$ .

629

630 **Supplemental Figure 1.** Heatmap of Pearson's correlation coefficient (PCC) calculated between  
631 transcriptomes of biological replicates 1, 2 and 3 of mesophyll and bundle sheath samples

632 collected at time-points 0, 6, 10, 14, 18 and 22 hrs. High to low values of Pearson's correlation  
633 coefficient are shown as red to blue.

634

635 **Supplemental Figure 2.** Components of the maize circadian oscillator. **A)** Species tree inferred by  
636 *Orthofinder* with bootstrap values displayed at each node. **B-C)** Orthologue trees inferred for  
637 *PRR7* (B) and *PRR3/5/9* (C). **D)** Diel transcript abundance profile of genes for the circadian  
638 oscillator in mesophyll and bundle sheath cells. x-axis represents time-points and y-axis transcript  
639 abundance. TPM represents Transcripts Per Million reads. White and black bars on x-axis denote  
640 light and dark periods, respectively. *CCA1/LHY.1*, GRMZM2G014902; *CCA1/LHY.2*,  
641 GRMZM2G474769; *PRR7.1*, GRMZM2G005732; *PRR7.2*, GRMZM2G033962; *PRR7.3*,  
642 GRMZM2G095727; *PRR3/5/9.1*, GRMZM2G179024; *PRR3/5/9.2*, GRMZM2G367834; *ELF3*,  
643 GRMZM2G045275; *LUX*, GRMZM2G067702; *TOC1.1*, GRMZM2G148453; *TOC1.2*,  
644 GRMZM2G020081; *TOC1.3*, GRMZM2G066638; *TOC1.4*, GRMZM2G145058; *TOC1.5*,  
645 GRMZM2G174083; *TOC1.6*, GRMZM2G365688.

646

647 **Supplemental Figure 3.** Photosynthetic parameters measured for maize leaf fragments under one  
648 light-dark cycle (16 hrs light : 8 hrs dark) followed by 72 hours of a light regime that consisted of  
649 cycles of 40 minutes light and 20 minutes darkness. Data shown as mean with standard error ( $n =$   
650 6 biological replicates). **A)**  $F_m$ : maximum possible yield of fluorescence, **B)** Linear detrended  $F_v/F_m$ :  
651 maximum quantum efficiency of Photosystem II (PSII) photochemistry, **C)**  $\phi_{PSII}$ : operating  
652 efficiency of PSII, and **D)**  $F_v'/F_m'$ : maximum efficiency of PSII photochemistry in the light. Black and  
653 grey bars represent dark period and subjective night, respectively. Empirical  $p$ -values calculated  
654 using the meta.meta function in MetaCycle from timepoints 48-96 hours in repeating light where  
655  $emp\ p < 0.01$  is considered rhythmic.

656

657 **Supplemental Figure 4.** Distribution of biological processes across the diel time-course and  
658 between mesophyll and bundle sheath cells. Dot plot showing the categories of biological  
659 processes with highest significance for each cluster ( $FDR \leq 0.01$ ). Clusters 1 to 3 peaked from dawn  
660 to 2 hours of light, clusters 5 to 8 from 6 to 10 hrs, clusters 9 to 13 from 14 to 22 hrs, cluster 14 at  
661 dawn and 22 hrs, and cluster 15 from dawn to 22 hrs. Gene ratio represents the proportion of  
662 genes assigned to a functional category in a cluster. M and BS represent mesophyll and bundle  
663 sheath cells, respectively.

664

665 **Supplemental Figure 5.** Line plots representing the diel transcript abundance profile of genes  
666 encoding the cognate transcription factors for DNA-binding motifs enriched in mesophyll- and  
667 bundle sheath-preferential clusters of co-expressed genes. The x-axis represents time-points and  
668 the y-axis TPM values. TPM represents Transcripts Per Million reads. White and black bars in the x-  
669 axis denote light and dark periods, respectively. M and BS represent mesophyll and bundle sheath  
670 cells, respectively. CPP-transcription factor 1 (CPP1), GRMZM2G153754; G2-like-transcription  
671 factor 56 (GLK56), GRMZM2G067702; MYB-transcription factor 138 (MYB138), GRMZM2G139688;  
672 DNA-binding One Zinc Finger 21 (DOF21), GRMZM2G162749; MYB-transcription factor 14  
673 (MYB14), GRMZM2G172327; HSF-transcription factor 19 (HSFTF19), AC216247.3\_FG001; SBP-  
674 transcription factor 6 (SBP6), GRMZM2G138421; KNOTTED 1 (KN1), GRMZM2G017087; ABI3-VP1-  
675 transcription factor 19 (ABI19), GRMZM2G035701; NLP-transcription factor 13 (NLP13),  
676 GRMZM2G053298; SBP-transcription factor 17 (SBP17), GRMZM2G156756; HSF-transcription  
677 factor 8 (HSFTF8), GRMZM2G164909; HSF-transcription factor 4 (HSFTF4), GRMZM2G125969;  
678 BBR/BCP-transcription factor 3 (BBR3), GRMZM2G164735; BBR/BCP-transcription factor 4 (BBR4),  
679 GRMZM2G118690; Dwarf Plant 8 (D8), GRMZM2G144744; MADS-domain protein 1 (MADS1),  
680 GRMZM2G171365; DNA-binding One Zinc Finger 2 (DOF2), GRMZM2G009406; Viviparous 1 (VP1),  
681 GRMZM2G133398.

682

683 **Supplemental Figure 6.** Gene co-expression network built from RNA-seq data and DNA motif  
684 enrichment analysis. **A)** Transcripts encoding transcription factors (TF) with DNA-binding motif hits  
685 in photosynthesis (PS) genes ( $C_4$  genes and Calvin-Benson-Bassham cycle genes) were filtered by  
686 their expression levels [Transcripts Per Million reads (TPM) > 5] and a gene co-expression network  
687 built for TF and PS genes using Pearson's correlation coefficient (cutoffs of < 0.3 and > -0.3). **B)**  
688 Gene co-expression network for TF and bundle sheath-preferential PS genes in clusters 7 and 3.  
689 Nodes represent TF (grey) and PS genes present in clusters 7 (dark blue) and 3 (light blue). Edges  
690 represent positive (green) and negative (red) co-expression based on the Pearson's correlation  
691 coefficient (PCC).

692



693 **Literature cited**

- 694 Akyildiz, M., Gowik, U., Engelmann, S., Koczor, M., Streubel, M., & Westhoff, P. (2007). Evolution  
695 and function of a cis-regulatory module for mesophyll-specific gene expression in the C<sub>4</sub> dicot  
696 *Flaveria trinervia*. *The Plant Cell*, *19*, 3391–3402.
- 697 Aubry, S., Kelly, S., Kümpers, B., & Smith-Unna, R. (2014). Deep evolutionary comparison of gene  
698 expression identifies parallel recruitment of trans-factors in two independent origins of C<sub>4</sub>  
699 photosynthesis. *PLOS Genetics* *12*: e1006087.
- 700 Aubry, Sylvain, Aresheva, O., Reyna-Llorens, I., Smith-Unna, R. D., Hibberd, J. M., & Genty, B.  
701 (2016). A specific transcriptome signature for guard cells from the C<sub>4</sub> plant *Gynandropsis*  
702 *gynandra*. *Plant Physiology*, *170*, 1345–1357.
- 703 Bailey, T. L., Boden, M., Buske, F. A., Frith, M., Grant, C. E., Clementi, L., Ren, J., Li, W. W., & Noble,  
704 W. S. (2009). MEME Suite: Tools for motif discovery and searching. *Nucleic Acids Research*,  
705 *37*, W202–W208.
- 706 Benjamini, Y., & Hochberg, Y. (1995). Controlling the False Discovery Rate: a practical and powerful  
707 approach to multiple testing. *Journal of the Royal Statistical Society. Series B*, *57*, 289–300.
- 708 Berry, J. O., Carr, J. P., & Klessig, D. F. (1988). mRNAs encoding Ribulose 1,5-bisphosphate  
709 Carboxylase remain bound to polysomes but are not translated in Amaranth seedlings  
710 transferred to darkness. *Proceedings of the National Academy of Sciences of the United States*  
711 *of America*, *85*, 4190–4194.
- 712 Berry, J. O., Nikolau, B. J., Carr, J. P., & Klessig, D. F. (1986). Translational regulation of light-  
713 induced ribulose 1 5-bisphosphate carboxylase gene expression in Amaranth (*Amaranthus*  
714 *hypochondriacus*). *Molecular and Cellular Biology*, *6*, 2347–2353.
- 715 Borba, A. R., Serra, T. S., Górska, A., Gouveia, P., Cordeiro, A. M., Reyna-Llorens, I., Kneřová, J.,  
716 Barros, P. M., Abreu, I. A., Oliveira, M. M., Hibberd, J. M., & Saibo, N. J. M. (2018). Synergistic  
717 binding of bHLH transcription factors to the promoter of the maize NADP-ME gene used in C<sub>4</sub>  
718 photosynthesis is based on an ancient code found in the ancestral C<sub>3</sub> state. *Molecular Biology*  
719 *and Evolution*, *35*, 1690–1705.
- 720 Borello, U., Ceccarelli, E., & Giuliano, G. (1993). Constitutive, light-responsive and circadian clock-  
721 responsive factors compete for the different I box elements in plant light-regulated  
722 promoters. *The Plant Journal*, *4*, 611–619.
- 723 Bowes, G., Ogren, W. L., & Hageman, R. H. (1971). Phosphoglycolate production catalyzed by  
724 Ribulose Diphosphate Carboxylase. *Biochemical and Biophysical Research Communications*,  
725 *45*, 716–722.

- 726 Boyle, P., & Després, C. (2010). Dual-function transcription factors and their entourage: unique  
727 and unifying themes governing two pathogenesis-related genes. *Plant Signaling and*  
728 *Behavior*, *5*, 629–634.
- 729 Castelán-Muñoz, N., Herrera, J., Cajero-Sánchez, W., Arrizubieta, M., Trejo, C., García-Ponce, B.,  
730 Sánchez, M. de la P., Álvarez-Buylla, E. R., & Garay-Arroyo, A. (2019). MADS-box genes are key  
731 components of genetic regulatory networks involved in abiotic stress and plastic  
732 developmental responses in plants. *Frontiers in Plant Science*, *10*,  
733 [doi.org/10.3389/fpls.2019.00853](https://doi.org/10.3389/fpls.2019.00853)
- 734 Chang, Y.-M., Liu, W.-Y., Shih, A. C.-C., Shen, M.-N., Lu, C.-H., Lu, M.-Y. J., Yang, H.-W., Wang, T.-Y.,  
735 Chen, S. C.-C., Chen, S. M., Li, W.-H., & Ku, M. S. B. (2012). Characterizing regulatory and  
736 functional differentiation between maize mesophyll and bundle sheath cells by  
737 transcriptomic analysis. *Plant Physiology*, *160*, 165–177.
- 738 Chotewutmontri, P., & Barkan, A. (2021). Ribosome profiling elucidates differential gene  
739 expression in bundle sheath and mesophyll cells in maize. *Plant Physiology* *187*, 59-72.
- 740 Covshoff, S., Furbank, R. T., Leegood, R. C., & Hibberd, J. M. (2013). Leaf rolling allows  
741 quantification of mRNA abundance in mesophyll cells of sorghum. *Journal of Experimental*  
742 *Botany*, *63*, 807–813.
- 743 Crafts-Brandner, S. J., & Salvucci, M. E. (2002). Sensitivity of Photosynthesis in a C<sub>4</sub> Plant, Maize, to  
744 Heat Stress. *Plant Physiology*, *129*, 1773–1780.
- 745 Dakhiya, Y., Hussien, D., Fridman, E., Kiflawi, M., & Green, R. (2017). Correlations between  
746 Circadian Rhythms and Growth in Challenging Environments. *Plant Physiology*, *173*, 1724–  
747 1734.
- 748 Demmig, B., & Björkman, O. (1987). Photon yield of O<sub>2</sub> evolution and chlorophyll fluorescence  
749 characteristics at 77K among vascular plants of diverse origins. *Planta*, *170*, 489–504.
- 750 Dodd, A. N., Salathia, N., Hall, A., Kévei, E., Tóth, R., Nagy, F., Hibberd, J. M., Millar, A. J., & Webb,  
751 A. A. R. (2005). Plant circadian clocks increase photosynthesis, growth, survival, and  
752 competitive advantage. *Science*, *309*, 630–633.
- 753 Emms, D. M., & Kelly, S. (2019). OrthoFinder: Phylogenetic orthology inference for comparative  
754 genomics. *Genome Biology*, *20*, 1–14.
- 755 Ghannoum, O., Evans, J. R., & von Caemmerer, S. (2010). Nitrogen and water use efficiency of C<sub>4</sub>  
756 plants. In A. Raghavendra & S. RF (Eds.) *C<sub>4</sub> photosynthesis and related CO<sub>2</sub> concentrating*  
757 *mechanisms*. Springer, Dordrecht.
- 758 Giuliano, G., Pichersky, E., Malik, V. S., Timko, M. P., Scolnik, P. a, & Cashmore, a R. (1988). An

- 759 evolutionarily conserved protein binding sequence upstream of a plant light-regulated gene.  
760 *Proceedings of the National Academy of Sciences of the United States of America*, *85*, 7089–  
761 7093.
- 762 Gowik, U., Burscheidt, J., Akyildiz, M., Schlue, U., Koczor, M., Streubel, M., & Westhoff, P. (2004).  
763 Cis-regulatory elements for mesophyll-specific gene expression in the C<sub>4</sub> plant *Flaveria*  
764 *trinervia*, the promoter of the C<sub>4</sub> *PHOSPHOENOLPYRUVATE CARBOXYLASE* gene. *The Plant*  
765 *Cell*, *16*, 1077–1090.
- 766 Gowik, U., Schulze, S., Saladié, M., Rolland, V., Tanz, S. K., Westhoff, P., & Ludwig, M. (2017). A  
767 MEM1-like motif directs mesophyll cell-specific expression of the gene encoding the C<sub>4</sub>  
768 Carbonic Anhydrase in *Flaveria*. *Journal of Experimental Botany*, *68*, 311–320.
- 769 Haberlandt, G. F. J. (1904). *Physiologische Pflanzenanatomie*. Leipzig W. Engelmann.
- 770 Harmer, S. L., Hogenesch, J. B., Straume, M., Chang, H.-S., Han, B., Zhu, T., Wang, X., Kreps, J. A., &  
771 Kay, S. A. (2000). Orchestrated transcription of key pathways in Arabidopsis by the circadian  
772 clock. *Science*, *290*, 2110–2113.
- 773 Hatch, M. D. (1987). C<sub>4</sub> photosynthesis: a unique blend of modified biochemistry, anatomy and  
774 ultrastructure. *Biochimica et Biophysica Acta*, *895*, 81–106.
- 775 Heimann, L., Horst, I., Perduns, R., Dreesen, B., Offermann, S., & Peterhänsel, C. (2013). A common  
776 histone modification code on C<sub>4</sub> genes in maize and its conservation in Sorghum and *Setaria*  
777 *italica*. *Plant Physiology*, *162*, 456–469.
- 778 Hendron, R. W., & Kelly, S. (2020). Subdivision of Light Signaling Networks Contributes to  
779 Partitioning of C<sub>4</sub> Photosynthesis. *Plant Physiology*, *182*, 1297–1309.
- 780 Hibberd, J. M., & Covshoff, S. (2010). The regulation of gene expression required for C<sub>4</sub>  
781 photosynthesis. *Annu. Rev. Plant Biol*, *61*, 181–207.
- 782 Huson, D. H., Rupp, R., Berry, V., Gambette, P., & Paul, C. (2009). Computing galled networks from  
783 real data. *Bioinformatics*, *25*, i85–i93.
- 784 Jin, J., Tian, F., Yang, D. C., Meng, Y. Q., Kong, L., Luo, J., & Gao, G. (2017). PlantTFDB 4.0: Toward a  
785 central hub for transcription factors and regulatory interactions in plants. *Nucleic Acids*  
786 *Research*, *45*, D1040–D1045.
- 787 John, C. R., Smith-Unna, R. D., Woodfield, H., Covshoff, S., & Hibberd, J. M. (2014). Evolutionary  
788 convergence of cell-specific gene expression in independent lineages of C<sub>4</sub> grasses. *Plant*  
789 *Physiology*, *165*(1), 62–75.
- 790 Kagawa, T., & Hatch, M. D. (1974). C<sub>4</sub>-acids as the source of carbon dioxide for Calvin cycle  
791 photosynthesis by bundle sheath cells of the C<sub>4</sub>-pathway species *Atriplex spongiosa*.

- 792 *Biochemical and Biophysical Research Communications*, 59, 1326–1332.
- 793 Kajala, K., Brown, N. J., Williams, B. P., Borrill, P., Taylor, L. E., & Hibberd, J. M. (2012). Multiple  
794 *Arabidopsis* genes primed for recruitment into C<sub>4</sub> photosynthesis. *The Plant Journal*, 69, 47–  
795 56.
- 796 Kalt-Torres, W., Kerr, P. S., Usuda, H., & Huber, S. C. (1987). Diurnal Changes in Maize Leaf  
797 Photosynthesis. I. Carbon exchange rate, assimilate export rate, and enzyme activities. *Plant*  
798 *Physiology*, 83, 283–288.
- 799 Ko, D. K., Rohozinski, D., Song, Q., Taylor, S. H., Juenger, T. E., Harmon, F. G., & Chen, Z. J. (2016).  
800 Temporal Shift of Circadian-Mediated Gene Expression and Carbon Fixation Contributes to  
801 Biomass Heterosis in Maize Hybrids. *PLoS Genetics*, 12, 1–31.
- 802 Kùlahoglu, C., Denton, A. K., Sommer, M., Maß, J., Schliesky, S., Wrobel, T. J., Berckmans, B.,  
803 Gongora-Castillo, E., Buell, C. R., Simon, R., De Veylder, L., Bräutigam, A., & Weber, A. P. M.  
804 (2014). Comparative transcriptome atlases reveal altered gene expression modules between  
805 two Cleomaceae C<sub>3</sub> and C<sub>4</sub> plant species. *The Plant Cell*, 26, 3243–3260.
- 806 Kümpers, B. M. C., Burgess, S. J., Reyna-llorens, I., Smith-unna, R., Boursnell, C., & Hibberd, J. M.  
807 (2017). Shared characteristics underpinning C<sub>4</sub> leaf maturation derived from analysis of  
808 multiple C<sub>3</sub> and C<sub>4</sub> species of *Flaveria*. *Journal of Experimental Botany*, 68, 177–189.
- 809 Lai, X., Bendix, C., Yan, L., Zhang, Y., Schnable, J.C. and Harmon, F.G., (2020). Interspecific analysis  
810 of diurnal gene regulation in panicoid grasses identifies known and novel regulatory  
811 motifs. *BMC Genomics*, 21, 1-17.
- 812 Langdale, J. A. (2011). C<sub>4</sub> cycles: past, present, and future research on C<sub>4</sub> photosynthesis. *The Plant*  
813 *Cell*, 23, 3879–3892.
- 814 Langdale, J. A., & Nelson, T. (1991). Spatial regulation of photosynthetic development in C<sub>4</sub> plants.  
815 *Trends in Genetics*, 7, 191–196.
- 816 Langmead, B., Trapnell, C., Pop, M., & Salzberg, S. L. (2009). Ultrafast and memory-efficient  
817 alignment of short DNA sequences to the human genome. *Genome Biology*, 10, R25.
- 818 Lee, T.-H., Tang, H., Wang, X., & Paterson, A. H. (2013). PGDD: A database of gene and genome  
819 duplication in plants. *Nucleic Acids Research*, 41, D1152–D1158.
- 820 Li, B., & Dewey, C. N. (2011). RSEM: Accurate transcript quantification from RNA-Seq data with or  
821 without a reference genome. *BMC Bioinformatics*, 12, 323.
- 822 Li, P., Ponnala, L., Gandotra, N., Wang, L., Si, Y., Tausta, S. L., Kebrom, T. H., Provart, N., Patel, R.,  
823 Myers, C. R., Reidel, E. J., Turgeon, R., Liu, P., Sun, Q., Nelson, T., & Brutnell, T. P. (2010). The  
824 developmental dynamics of the maize leaf transcriptome. *Nature Genetics*, 42, 1060–1067.

- 825 Litthauer, S., Battle, M. W., & Jones, M. A. (2016). Phototropins do not alter accumulation of  
826 evening-phased circadian transcripts under blue light. *Plant Signaling and Behavior*, *11*,  
827 e1126029.
- 828 Litthauer, S., Battle, M. W., Lawson, T., & Jones, M. A. (2015). Phototropins maintain robust  
829 circadian oscillation of PSII operating efficiency under blue light. *The Plant Journal*, *83*, 1034–  
830 1045.
- 831 Long, S. (1983). C<sub>4</sub> photosynthesis at low temperatures. *Plant, Cell & Environment*, *6*, 345–363.
- 832 Loriaux, S. D., Avenson, T. J., Welles, J. M., McDermitt, D. K., Eckles, R. D., Riensche, B., & Genty, B.  
833 (2013). Closing in on maximum yield of chlorophyll fluorescence using a single multiphase  
834 flash of sub-saturating intensity. *Plant Cell and Environment*, *36*, 1755–1770.
- 835 Lorimer, G. H. (1981). The carboxylation and oxygenation of ribulose 1,5-bisphosphate: the  
836 primary events in photosynthesis and photorespiration. *Annual Review of Plant Biology*, *32*,  
837 349–82.
- 838 Love, M. I., Huber, W., & Anders, S. (2014). Moderated estimation of fold change and dispersion  
839 for RNA-seq data with DESeq2. *Genome Biology*, *15*, 550.
- 840 Markelz, N. H., Costich, D. E., & Brutnell, T. P. (2003). Photomorphogenic responses in maize  
841 seedling development. *Plant Physiology*, *133*, 1578–1591.
- 842 Marshall, J. S., Stubbs, J. D., Chitty, J. A., Surin, B., & Taylor, W. C. (1997). Expression of the C<sub>4</sub> ME1  
843 gene from *Flaveria bidentis* requires an interaction between 5' and 3' sequences. *The Plant*  
844 *Cell*, *9*, 1515–1525.
- 845 McLeay, R. C., & Bailey, T. L. (2010). Motif Enrichment Analysis: A unified framework and an  
846 evaluation on ChIP data. *BMC Bioinformatics*, *11*, 165.
- 847 Meierhoff, K., & Westhoff, P. (1993). Differential biogenesis of Photosystem II in mesophyll and  
848 bundle-sheath cells of monocotyledonous NADP-Malic Enzyme-type C<sub>4</sub> plants: the non-  
849 stoichiometric abundance of the subunits of photosystem II in the bundle-sheath chloroplasts  
850 and the translational. *Planta*, *191*, 23–33.
- 851 Nusinow, D. A., Helfer, A., Hamilton, E. E., King, J. J., Imaizumi, T., Schultz, T. F., Farre, E. M., & Kay,  
852 S. A. (2011). The ELF4-ELF3- LUX complex links the circadian clock to diurnal control of  
853 hypocotyl growth. *Nature*, *475*, 398–402.
- 854 Patel, M., Corey, A. C., Yin, L.-P., Ali, S., Taylor, W. C., & Berry, J. O. (2004). Untranslated regions  
855 from C<sub>4</sub> Amaranth AhRbcS1 mRNAs confer translational enhancement and preferential  
856 bundle sheath cell expression in transgenic C<sub>4</sub> *Flaveria bidentis*. *Plant Physiology*, *136*, 3550–  
857 3561.

- 858 Patel, Minesh, Siegel, A. J., & Berry, J. O. (2006). Untranslated regions of FbRbcS1 mRNA mediate  
859 bundle sheath cell-specific gene expression in leaves of a C<sub>4</sub> plant. *The Journal of Biological*  
860 *Chemistry*, *281*, 25485–25491.
- 861 Ponnala, L., Wang, Y., Sun, Q., & van Wijk, K. J. (2014). Correlation of mRNA and protein  
862 abundance in the developing maize leaf. *The Plant Journal*, *78*, 424–440.
- 863 R Development Core Team. (2009). R: a language and environment for statistical computing.  
864 *Vienna, Austria: R Foundation for Statistical Computing*.
- 865 Resco de Dios, V., & Gessler, A. (2018). Circadian regulation of photosynthesis and transpiration  
866 from genes to ecosystems. *Environmental and Experimental Botany*, *152*, 37–48.
- 867 Reyna-Llorens, I., Burgess, S. J., Reeves, G., Singh, P., Stevenson, S. R., Williams, B. P., Stanley, S., &  
868 Hibberd, J. M. (2018). Ancient duons may underpin spatial patterning of gene expression in C<sub>4</sub>  
869 leaves. *Proceedings of the National Academy of Sciences*, *115*, 1931–1936.
- 870 Sage, R. F. (2004). The evolution of C<sub>4</sub> photosynthesis. *New Phytologist*, *161*, 341–370.
- 871 Sage, R. F., Sage, T. L., & Kocacinar, F. (2012). Photorespiration and the evolution of C<sub>4</sub>  
872 photosynthesis. *Annual Review of Plant Biology*, *63*, 19–47.
- 873 Schlüter, U., & Weber, A. P. M. (2020). Regulation and Evolution of C<sub>4</sub> Photosynthesis. *Annual*  
874 *Review of Plant Biology*, *71*, 183–215.
- 875 Sedelnikova, O. V, Hughes, T. E., & Langdale, J. A. (2018). Understanding the genetic basis of C<sub>4</sub>  
876 Kranz anatomy with a view to engineering C<sub>3</sub> crops. *Annual Review of Genetics*, *52*, 249–270.
- 877 Shannon, P., Markiel, A., Ozier, O., Baliga, N. S., Wang, J. T., Ramage, D., Amin, N., Schwikowski, B.,  
878 & Ideker, T. (2003). Cytoscape: A software Environment for integrated models of  
879 biomolecular interaction networks. *Genome Research*, *13*, 2498–2504.  
880 <https://doi.org/10.1101/gr.1239303>
- 881 Tausta, L. S., Li, P., Si, Y., Gandotra, N., Liu, P., Sun, Q., Brutnell, T. P., & Nelson, T. (2014).  
882 Developmental dynamics of Kranz cell transcriptional specificity in maize leaf reveals early  
883 onset of C<sub>4</sub>-related processes. *Journal of Experimental Botany*, *65*, 3543–3555.
- 884 Tian, T., Liu, Y., Yan, H., You, Q., Yi, X., Du, Z., Xu, W., & Zhen Su. (2017). AgriGO v2.0: a GO analysis  
885 toolkit for the agricultural community, 2017 update. *Nucleic Acids Research*, *45*, W122–W129.
- 886 Wagner, G. P., Kin, K., & Lynch, V. J. (2012). Measurement of mRNA abundance using RNA-seq  
887 data: RPKM measure is inconsistent among samples. *Theory in Biosciences*, *131*, 281–285.
- 888 Wang, L., Czedik-Eysenberg, A., Mertz, R. A., Si, Y., Tohge, T., Nunes-Nesi, A., Arrivault, S., Dedow,  
889 L. K., Bryant, D. W., Zhou, W., Xu, J., Weissmann, S., Studer, A., Li, P., Zhang, C., LaRue, T.,  
890 Shao, Y., Ding, Z., Sun, Q., ... Brutnell, T. P. (2014). Comparative analyses of C<sub>4</sub> and C<sub>3</sub>

- 891 photosynthesis in developing leaves of maize and rice. *Nature Biotechnology*, *32*, 1158–1165.
- 892 Wang, Y., Bräutigam, A., Weber, A. P. M., & Zhu, X.-G. (2014). Three distinct biochemical subtypes  
893 of C<sub>4</sub> photosynthesis? A modelling analysis. *Journal of Experimental Botany*, *65*, 3567–3578.
- 894 Wickham, H. (2009). *ggplot2: elegant graphics for data analysis*. Springer New York.
- 895 Williams, B. P., Burgess, S. J., Reyna-Llorens, I., Kneřová, J., Aubry, S., Stanley, S., & Hibberd, J. M.  
896 (2016). An untranslated cis-element regulates the accumulation of multiple C<sub>4</sub> enzymes in  
897 *Gynandropsis gynandra* mesophyll cells. *The Plant Cell*, *28*, 454–465.
- 898 Wiludda, C., Schulze, S., Gowik, U., Engelmann, S., Koczor, M., Streubel, M., Bauwe, H., &  
899 Westhoff, P. (2012). Regulation of the photorespiratory *GLDPA* gene in C<sub>4</sub> *Flaveria*: an  
900 intricate interplay of transcriptional and posttranscriptional processes. *The Plant Cell*, *24*,  
901 137–151.
- 902 Wittern, L., Steed, G., Taylor, L.J., Cano Ramirez, D., Pingarron-Cardenas, G., Gardner, K.,  
903 Greenland, A., Hannah, M.A. and Webb, A.A., (2023). Wheat EARLY FLOWERING 3 affects  
904 heading date without disrupting circadian oscillations. *Plant Physiology*, *191*, 1383–1403.
- 905 Wostrikoff, K., Clark, A., Sato, S., Clemente, T., & Stern, D. (2012). Ectopic expression of Rubisco  
906 subunits in maize mesophyll cells does not overcome barriers to cell type-specific  
907 accumulation. *Plant Physiology*, *160*, 419–432.
- 908 Wu, G., Anafi, R.C., Hughes, M.E., Kornacker, K., & Hogenesch, J.B. (2016) MetaCycle: An  
909 integrated R package to evaluate periodicity in large scale data. *Bioinformatics*, *32*, 3351–  
910 3353.
- 911 Xu, T., Purcell, M., Zucchi, P., Helentjaris, T., & Bogorad, L. (2001). TRM1, a YY1-like suppressor of  
912 *rbcS-m3* expression in maize mesophyll cells. *Proceedings of the National Academy of*  
913 *Sciences*, *98*, 2295–2300.
- 914 Yanagisawa, S. (2000). Dof1 and Dof2 transcription factors are associated with expression of  
915 multiple genes involved in carbon metabolism in maize. *The Plant Journal*, *21*, 281–288.
- 916 Yanagisawa, S., & Sheen, J. (1998). Involvement of maize Dof zinc finger proteins in tissue-specific  
917 and light-regulated gene expression. *The Plant Cell*, *10*, 75–89.
- 918 Yilmaz, A., Nishiyama, M. Y., Fuentes, B. G., Souza, G. M., Janies, D., Gray, J., & Grotewold, E.  
919 (2009). GRASSIUS: a platform for comparative regulatory genomics across the grasses. *Plant*  
920 *Physiology*, *149*, 171–180.
- 921 Zhao, J., Huang, X., Ouyang, X., Chen, W., Du, A., Zhu, L., Wang, S., Deng, X.W. and Li, S., 2012.  
922 OsELF3-1, an ortholog of Arabidopsis early flowering 3, regulates rice circadian rhythm and  
923 photoperiodic flowering. PloS One <https://doi.org/10.1371/journal.pone.0043705>

924 Zhao, Y., Zhao, B., Xie, Y., Jia, H., Li, Y., Xu, M., Wu, G., Ma, X., Li, Q., Hou, M. and Li, C., (2023). The  
925 evening complex promotes maize flowering and adaptation to temperate regions. *The Plant*  
926 *Cell*, 35, 369-389.



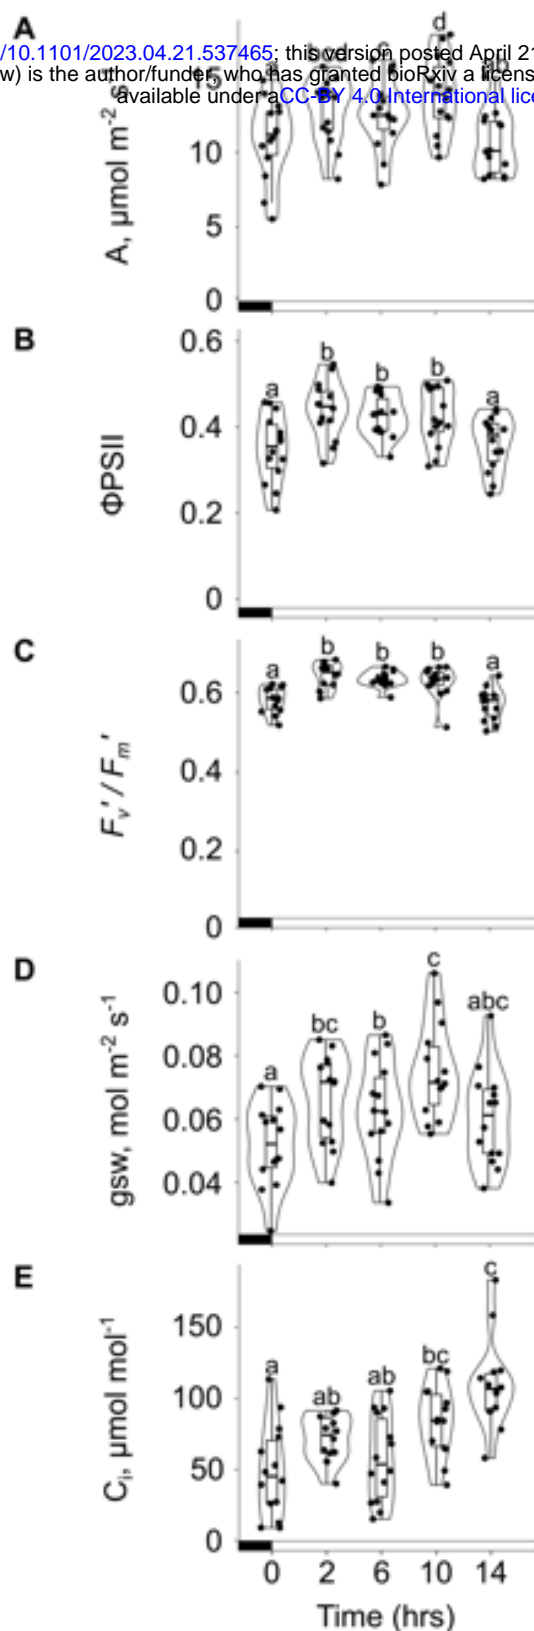

**Figure 1. Photosynthetic efficiency in maize fluctuates across the photoperiod.** A-E) Violin plots and boxplots showing photosynthetic parameters of light-adapted leaves during constant light and temperature. A)  $\text{CO}_2$  assimilation ( $A$ ) rate. B) Operating efficiency of Photosystem II ( $\Phi\text{PSII}$ ). C) Maximum efficiency of PSII photochemistry in the light ( $F_v'/F_m'$ ). D) Stomatal conductance ( $g_{sw}$ ) to water vapour. E) intercellular  $\text{CO}_2$  concentration ( $C_i$ ). Boxplot tails indicate 95% confidence intervals and different letters denote statistically significant differences between time-points determined by One-way repeated measures ANOVA, Tukey test ( $p \leq 0.05$ ,  $n = 14$  biological replicates). Each datapoint represents one biological replicate. Black and white bars in the x-axis denote dark and light periods respectively.

A

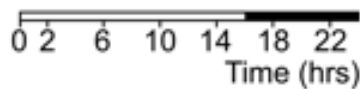

bioRxiv preprint doi: <https://doi.org/10.1101/2023.04.21.537465>; this version posted April 21, 2023. The copyright holder for this preprint (which was not certified by peer review) is the author/funder, who has granted bioRxiv a license to display the preprint in perpetuity. It is made available under a [CC-BY 4.0 International license](#).

B

| Parameter                        | Value            |
|----------------------------------|------------------|
| Read length                      | 150 bp           |
| Read type                        | Paired-end       |
| Average number of reads / sample | 88,521,792       |
| Mapped reads                     | 72,830,209 (82%) |

C

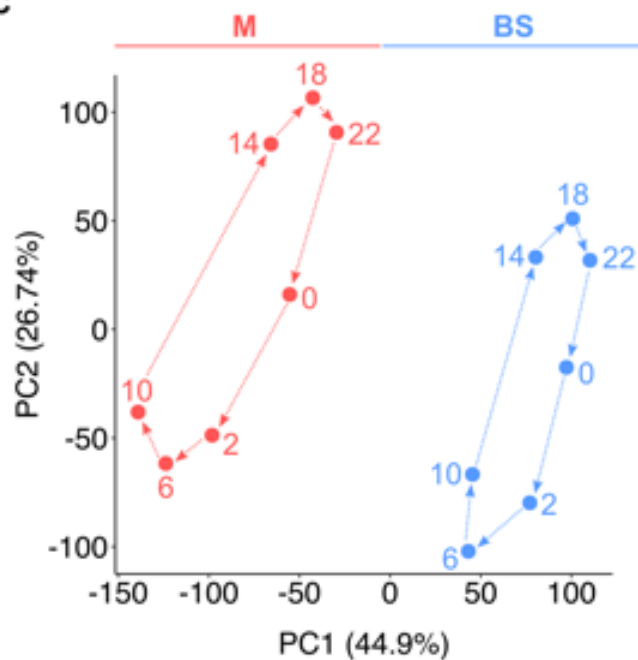

D

| Time (hrs) | no. DEGs | up M  | up BS |
|------------|----------|-------|-------|
| 0          | 9,690    | 4,645 | 5,045 |
| 2          | 10,830   | 5,310 | 5,520 |
| 6          | 12,572   | 6,016 | 6,556 |
| 10         | 12,175   | 5,777 | 6,398 |
| 14         | 10,735   | 5,166 | 5,569 |
| 18         | 12,408   | 6,045 | 6,363 |
| 22         | 11,960   | 5,634 | 6,326 |

**Figure 2. Maize mesophyll and bundle sheath transcriptomes over a diel time-course.** A) Mesophyll and bundle sheath transcriptomes were collected over 24-hours. White and black bars denote light and dark periods respectively. B) Transcriptome sequencing parameters. C) Principal Component Analysis of mesophyll and bundle sheath transcriptomes. Principal Component (PC) 1 and PC2 explain 45% and 27% of data variance, respectively. D) Number of differentially expressed genes (DEGs) between mesophyll and bundle sheath cells at each time-point: up-regulated in mesophyll [ $\log_2(M/BS) > 0$ ] or bundle sheath [ $\log_2(M/BS) < 0$ ] (DESeq2 differential expression testing with multiple test corrected  $p$ -adj  $< 0.01$ ). M and BS represent mesophyll and bundle sheath cells, respectively.

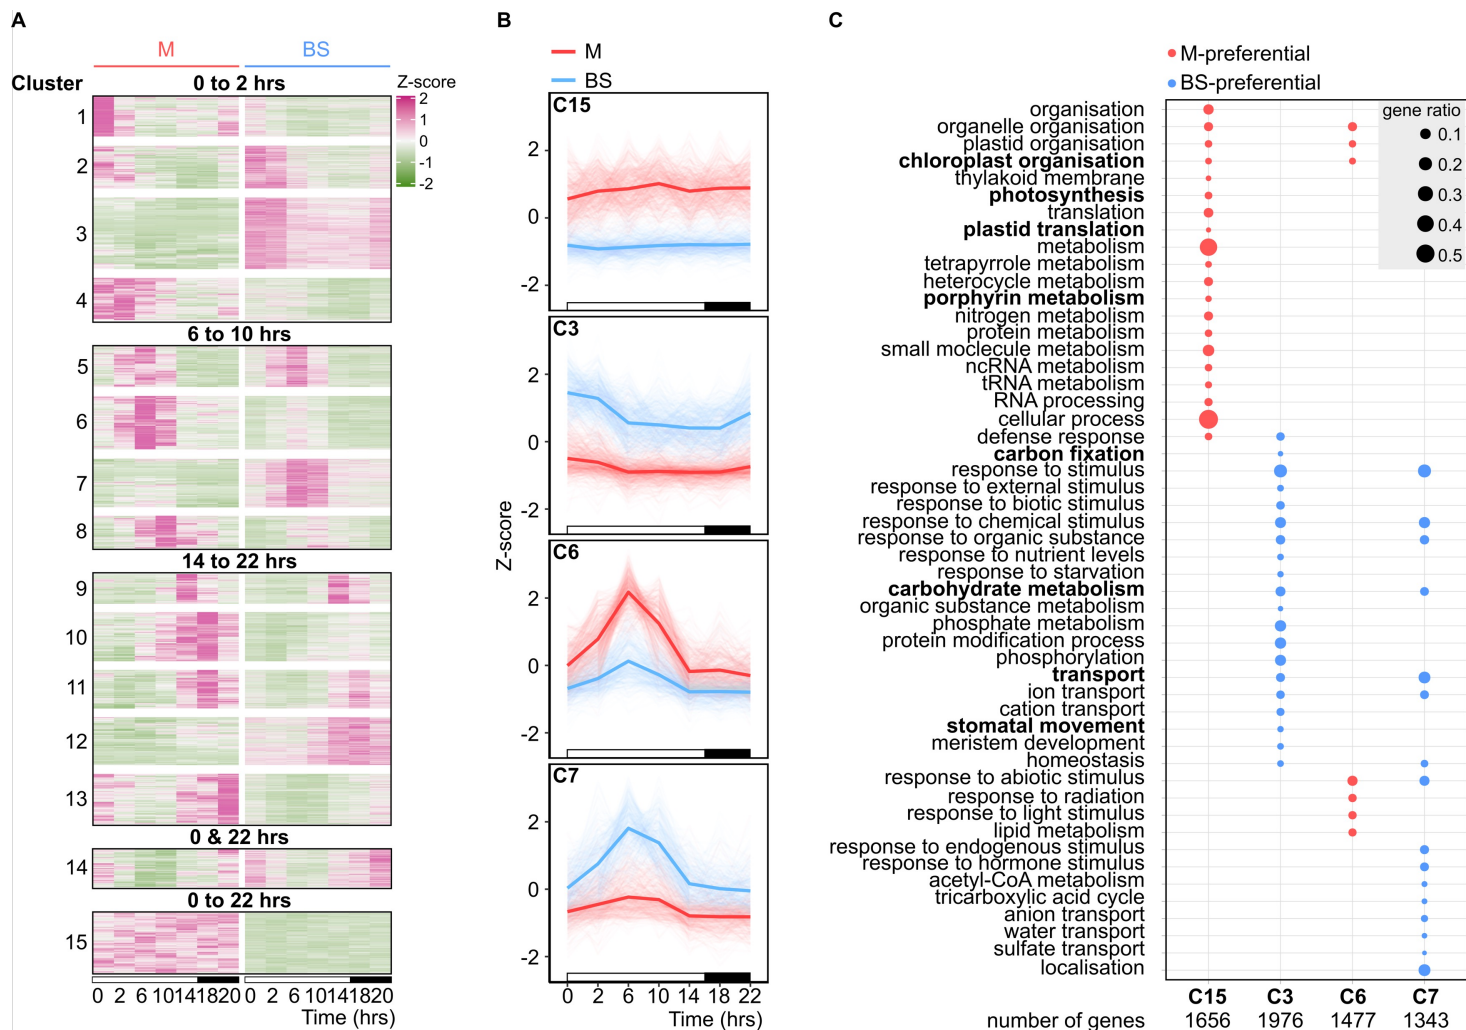

**Figure 3. Gene Ontology terms associated with time of day and cell type in the maize leaf.** A) Heatmap illustrating profiles of transcript abundance of co-expressed genes in mesophyll and bundle sheath cells across the diel time-course. Clusters are grouped based on the time they peak (from dawn to 2 hours of light, 6 to 10 hrs, 14 to 22 hrs, dawn and 22 hrs, and dawn to 22 hrs). x-axis represents time and y-axis Z-score. High to low Z-score values are shown as pink to green. B) Line plots representing the diel transcript abundance profile of clusters 15, 3, 6 and 7 in mesophyll and bundle sheath cells across the diel time-course. Thick lines denote the mean of Z-score values in mesophyll or bundle sheath. The x-axis represents time-points and the y-axis Z-score values. White and black bars in the x-axis denote light and dark periods, respectively. C) Dot plot showing the twenty categories of biological processes with highest significance for clusters 15, 3, 6 and 7 ( $FDR \leq 0.01$ ). Gene ratio represents the proportion of genes assigned to a functional category in a cluster. M and BS represent mesophyll and bundle sheath cells, respectively.

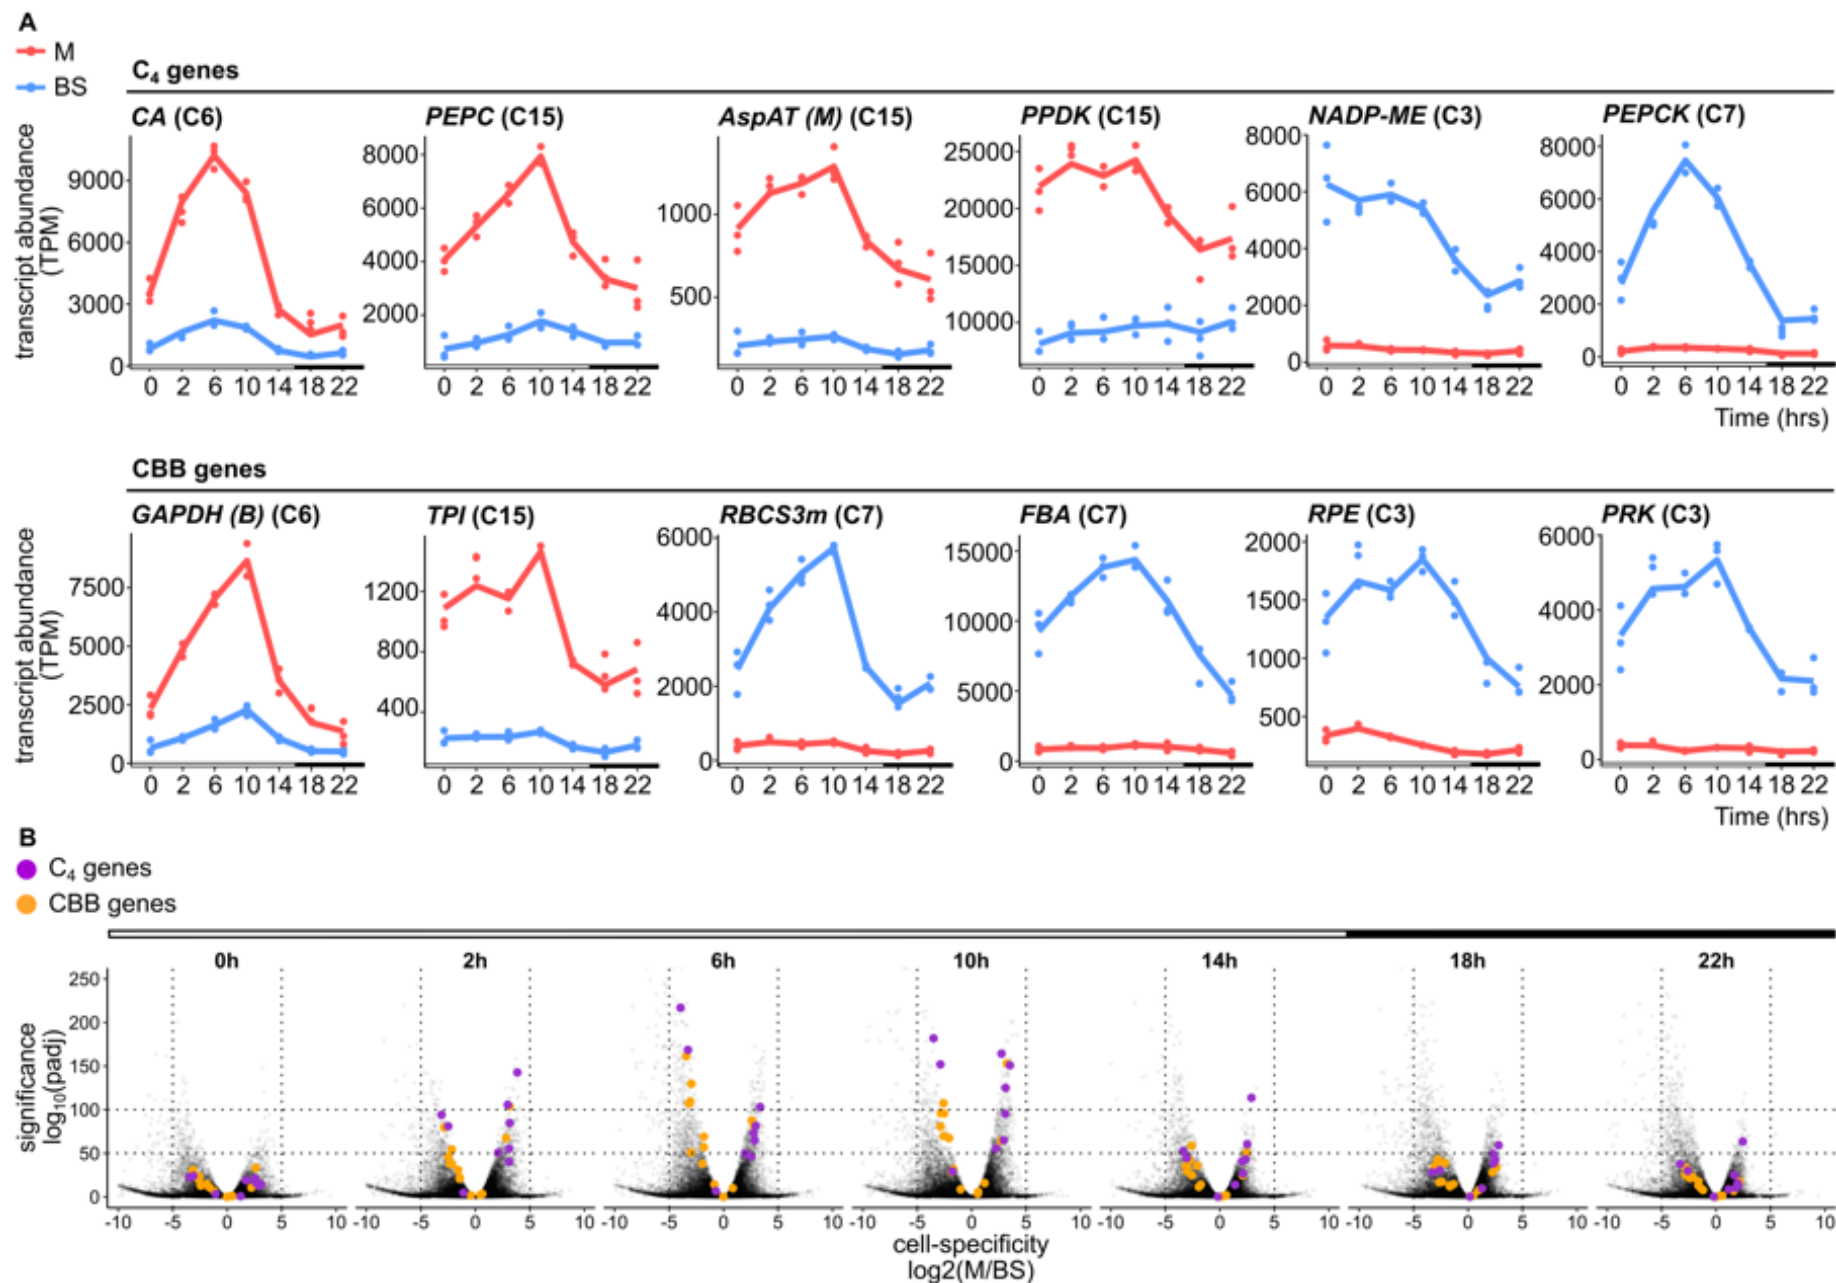

**Figure 4. Cell specificity of C<sub>4</sub> cycle and Calvin-Benson-Bassham cycle transcripts oscillates over the time-course.** A) C<sub>4</sub> genes and Calvin-Benson-Bassham cycle (CBB) genes present in clusters 15, 3, 6 and 7. x-axis depicts time and y-axis shows transcript abundance in Transcripts Per Million (TPM). White and black bars denote light and dark periods. Gene names are followed by cluster number in parentheses. B) Volcano plots showing the distribution of adjusted *p*-values in relation to the fold-change between mesophyll and bundle sheath cells. Purple and orange circles denote C<sub>4</sub> and Calvin-Benson-Bassham cycle genes respectively and grey datapoints the remaining transcriptome.

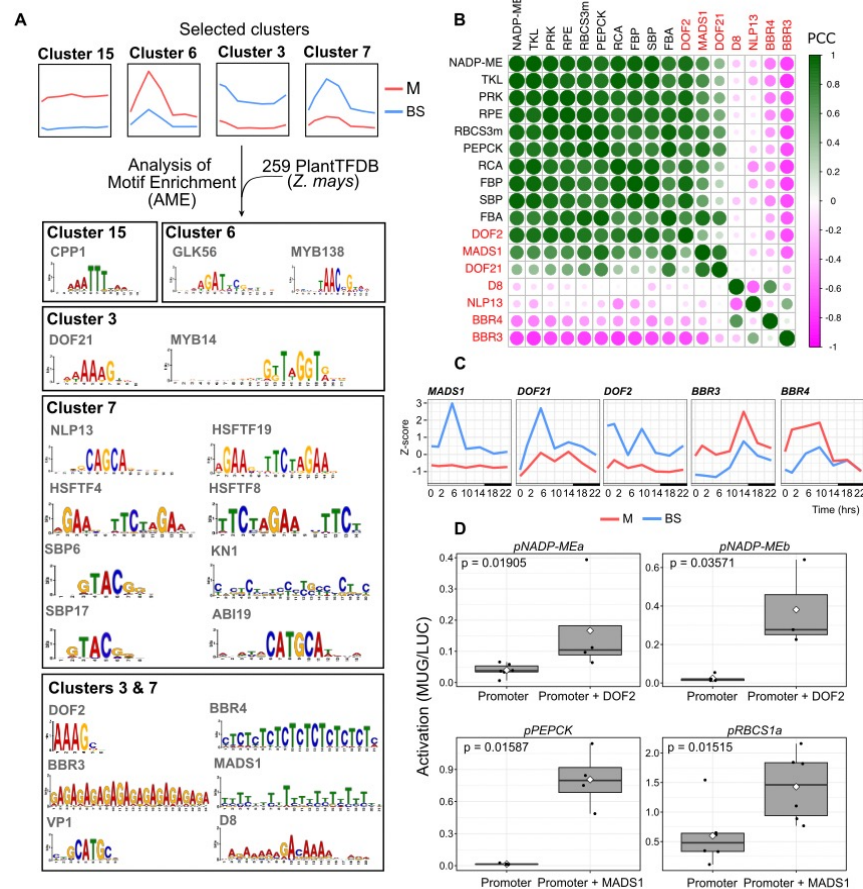

**Figure 5. Motifs and transcription factors associated with cell-preferential gene expression. A)** Four clusters were selected for analysis. DNA-binding motifs enriched in mesophyll clusters 15 and 6, or bundle sheath clusters 3 and 7. **B)** Heatmap illustrating Pearson's correlation coefficient (PCC) values for bundle sheath-preferential photosynthesis genes in clusters 7 and 3 and candidate transcriptional regulators. DNA-binding One Zinc Finger 2 (DOF2), GRMZM2G009406; MADS-domain protein 1 (MADS1), GRMZM2G171365; DNA-binding One Zinc Finger 21 (DOF21), GRMZM2G162749; Dwarf Plant 8 (D8), GRMZM2G144744; NLP-transcription factor 13 (NLP13), GRMZM2G053298; BBR/BCP-transcription factor 4 (BBR4), GRMZM2G118690; BBR/BCP-transcription factor 3 (BBR3), GRMZM2G164735. **C)** Line plots of diel transcript abundance for candidate regulators of bundle sheath-preferential photosynthesis genes. x-axis shows time and y-axis Z-score. White and black bars in the x-axis denote light and dark periods, respectively. M and BS represent mesophyll and bundle sheath cells. MADS-domain protein 1 (MADS1), GRMZM2G171365; DNA-binding One Zinc Finger 21 (DOF21), GRMZM2G162749; DNA-binding One Zinc Finger 2 (DOF2), GRMZM2G009406; BBR/BCP-transcription factor 3 (BBR3), GRMZM2G164735; BBR/BCP-transcription factor 4 (BBR4), GRMZM2G118690. **D)** Box plots showing promoter activation of bundle sheath-preferential genes *NADP-ME* (cluster 3), *PEPCK* (cluster 7) and *RBCS* (cluster 7) by transcription factors DOF2 and MADS1. Different letters represent statistically significant differences ( $P < 0.05$ ) as determined by two-sided, pairwise t-tests.  $n=6$  for *pNADMEa*, *pRBCS* and *pRBCS+MADS1*,  $n=5$  for *pNADPMEb* and *pPEPCK*,  $n=4$  for *pNADMEa+DOF2* and *pPEPCK+MADS1* and  $n=3$  for *pNADMEb+DOF1*.
